# Supplementary material for: Radiation-induced upregulation of FGL1 promotes esophageal squamous cell carcinoma metastasis via IMPDH1
Source: PubMed Central journal article supplement (PMC11067193; doi:10.1186/s12885-024-12313-7), 2024-05-03

Figure 1B

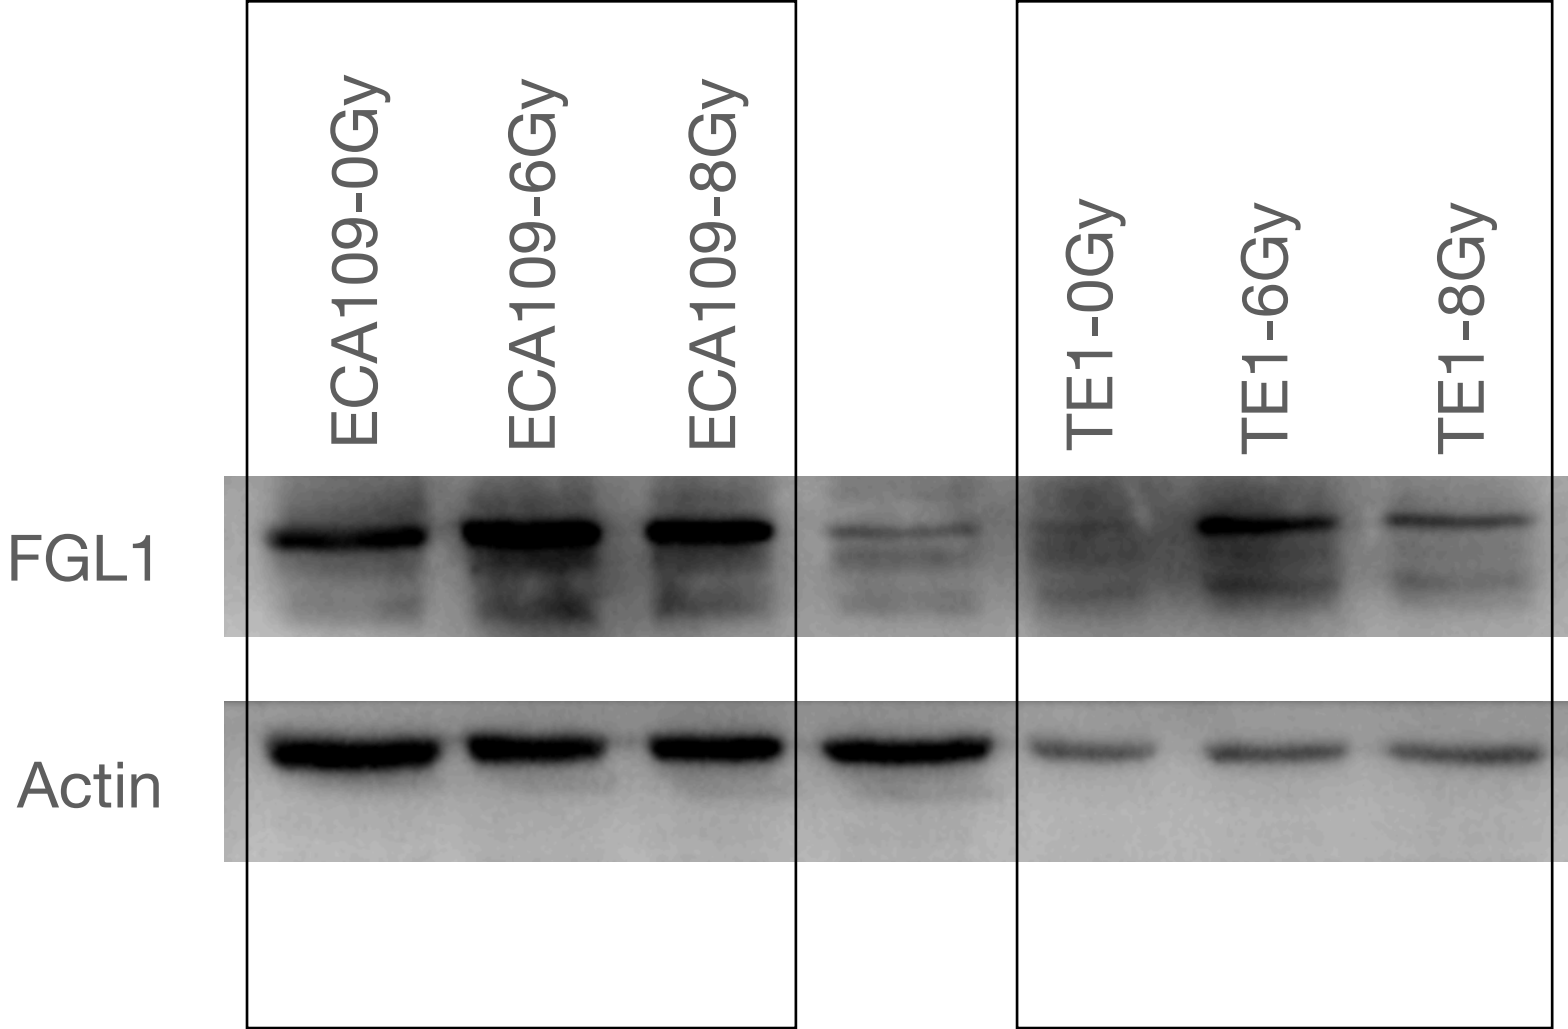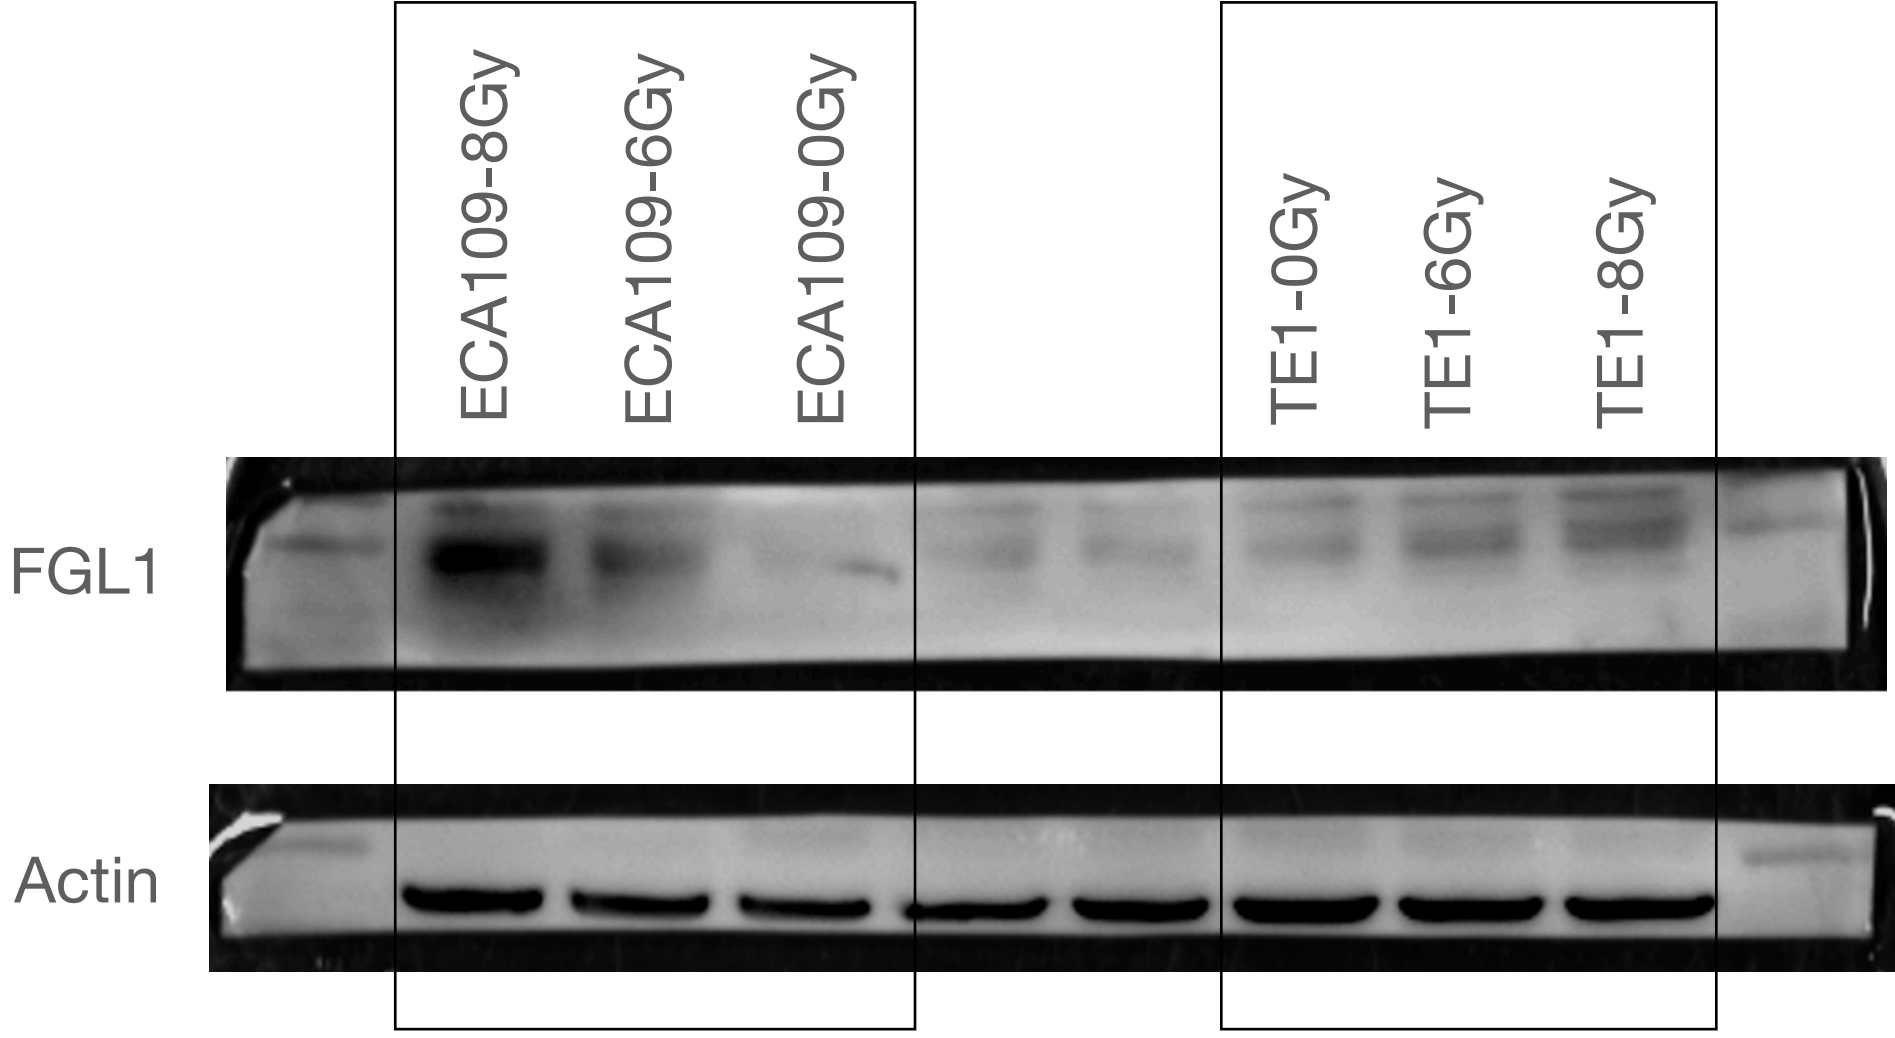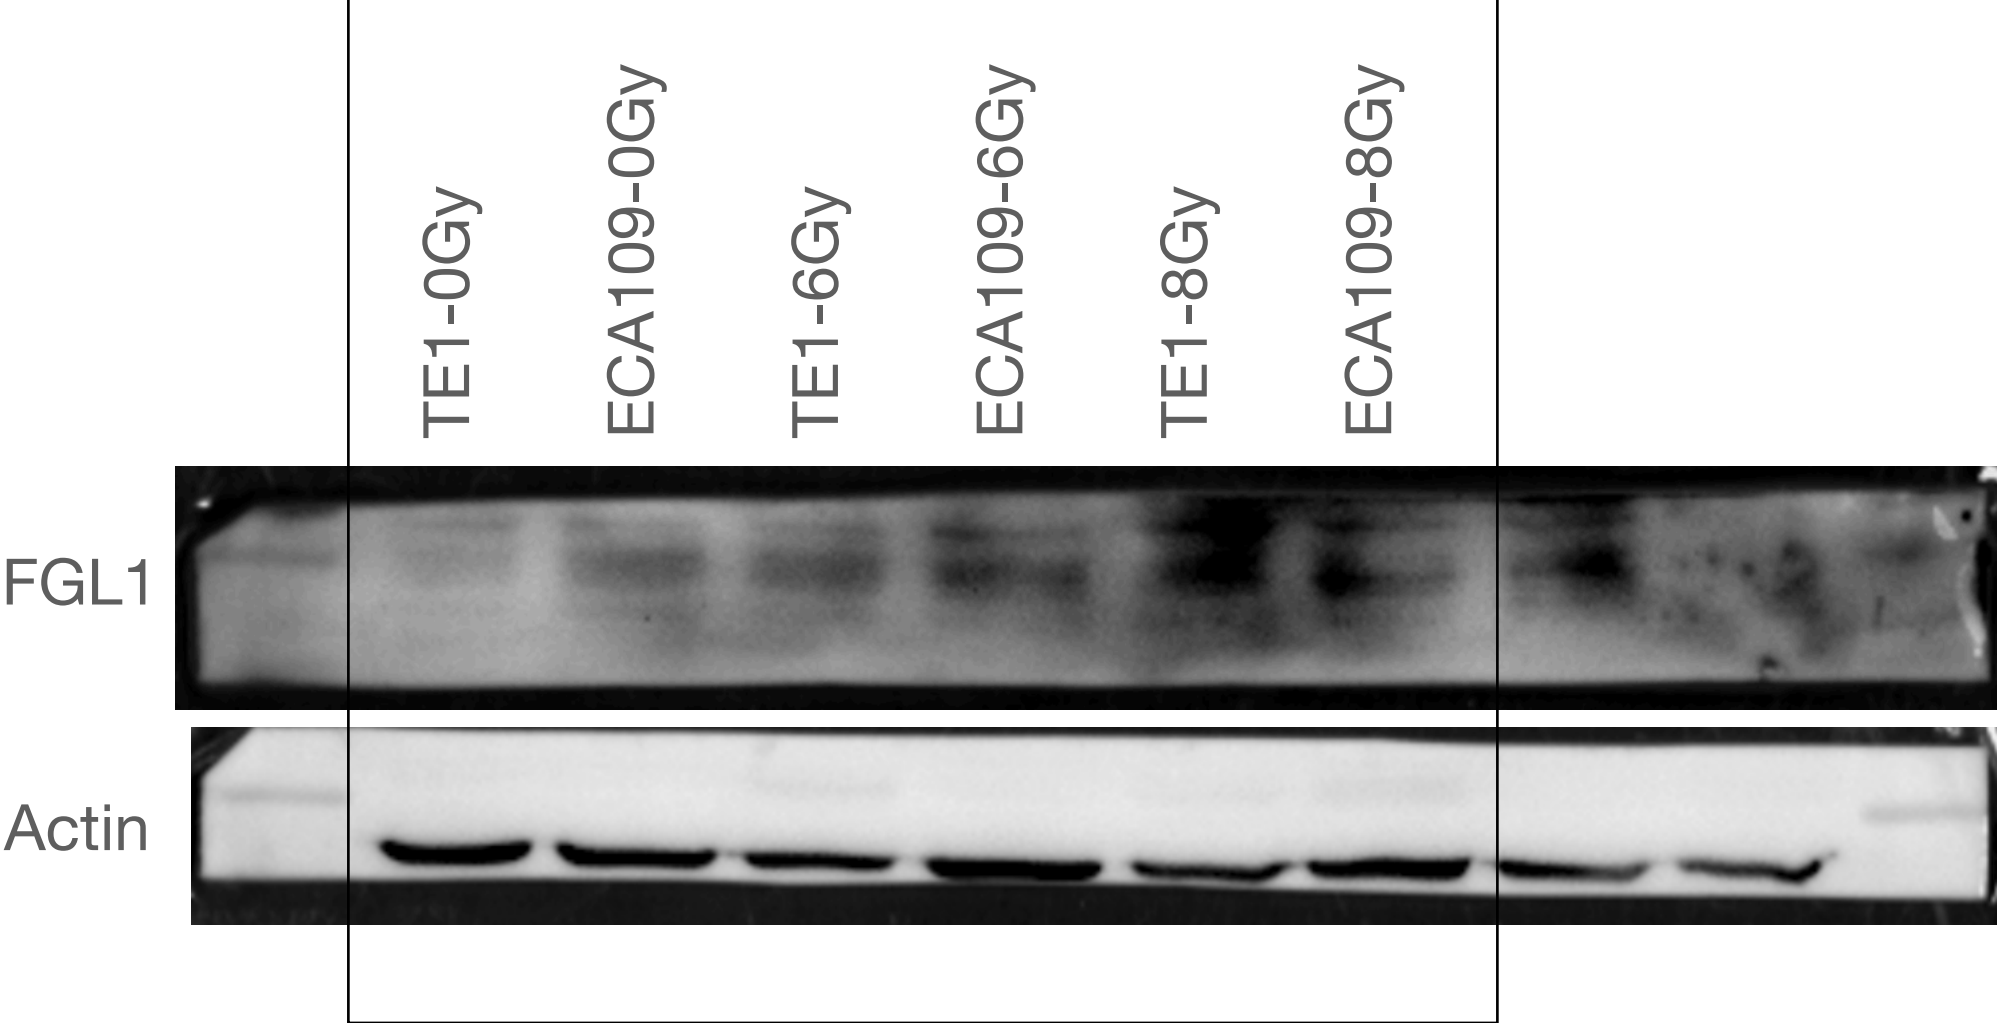

Figure 1H and 1K

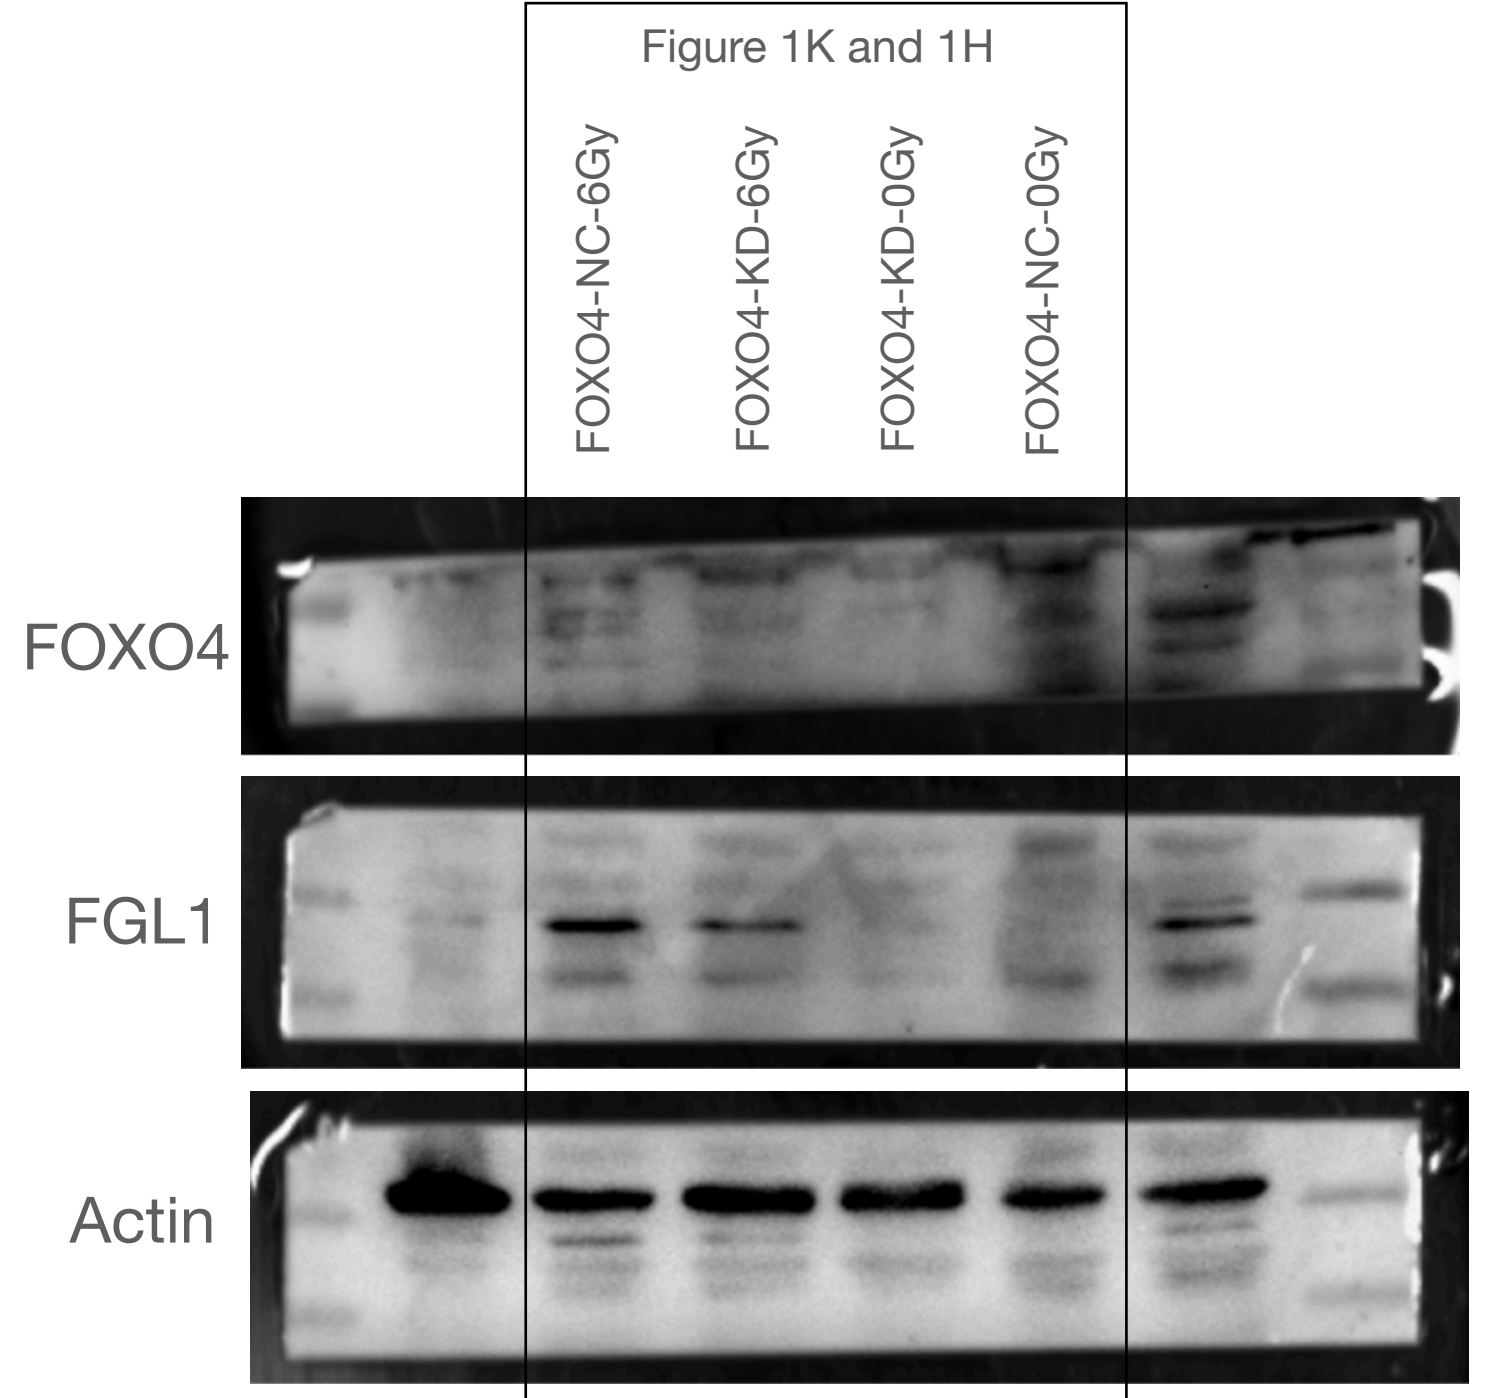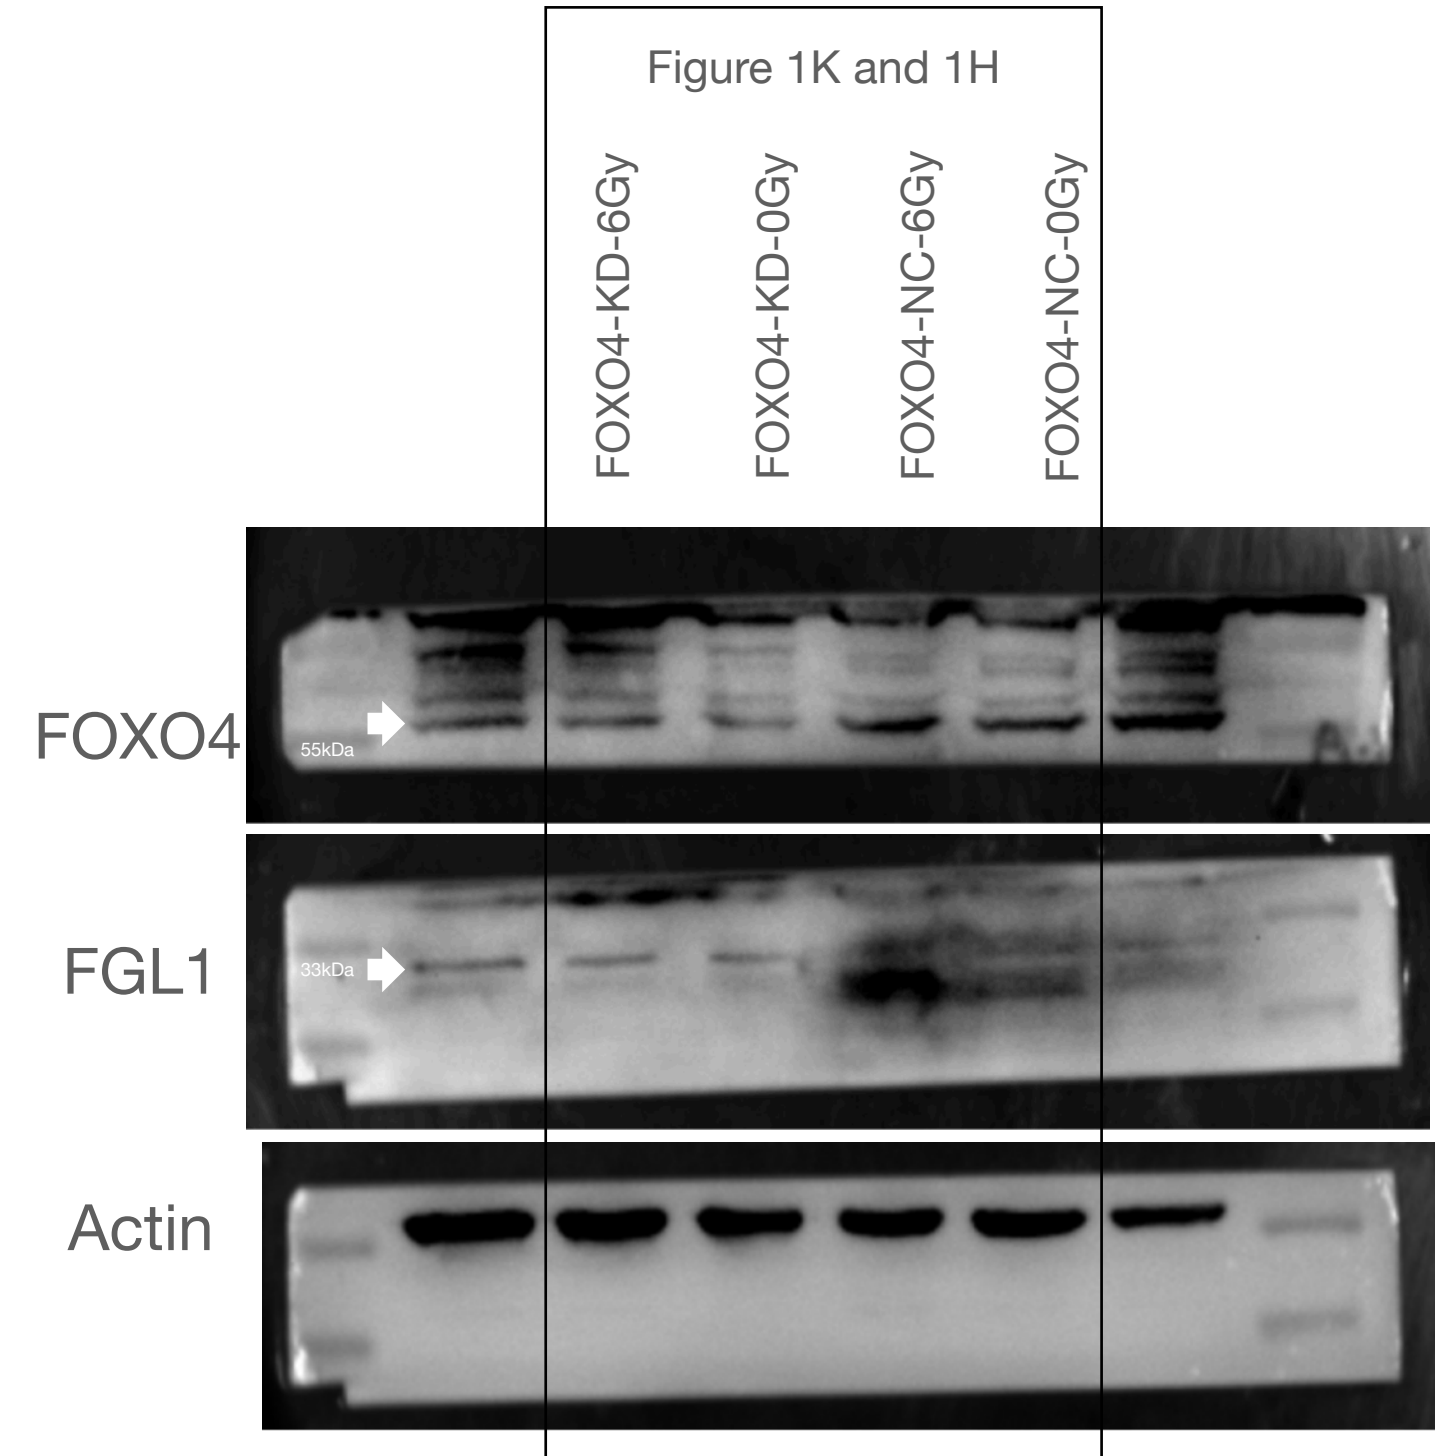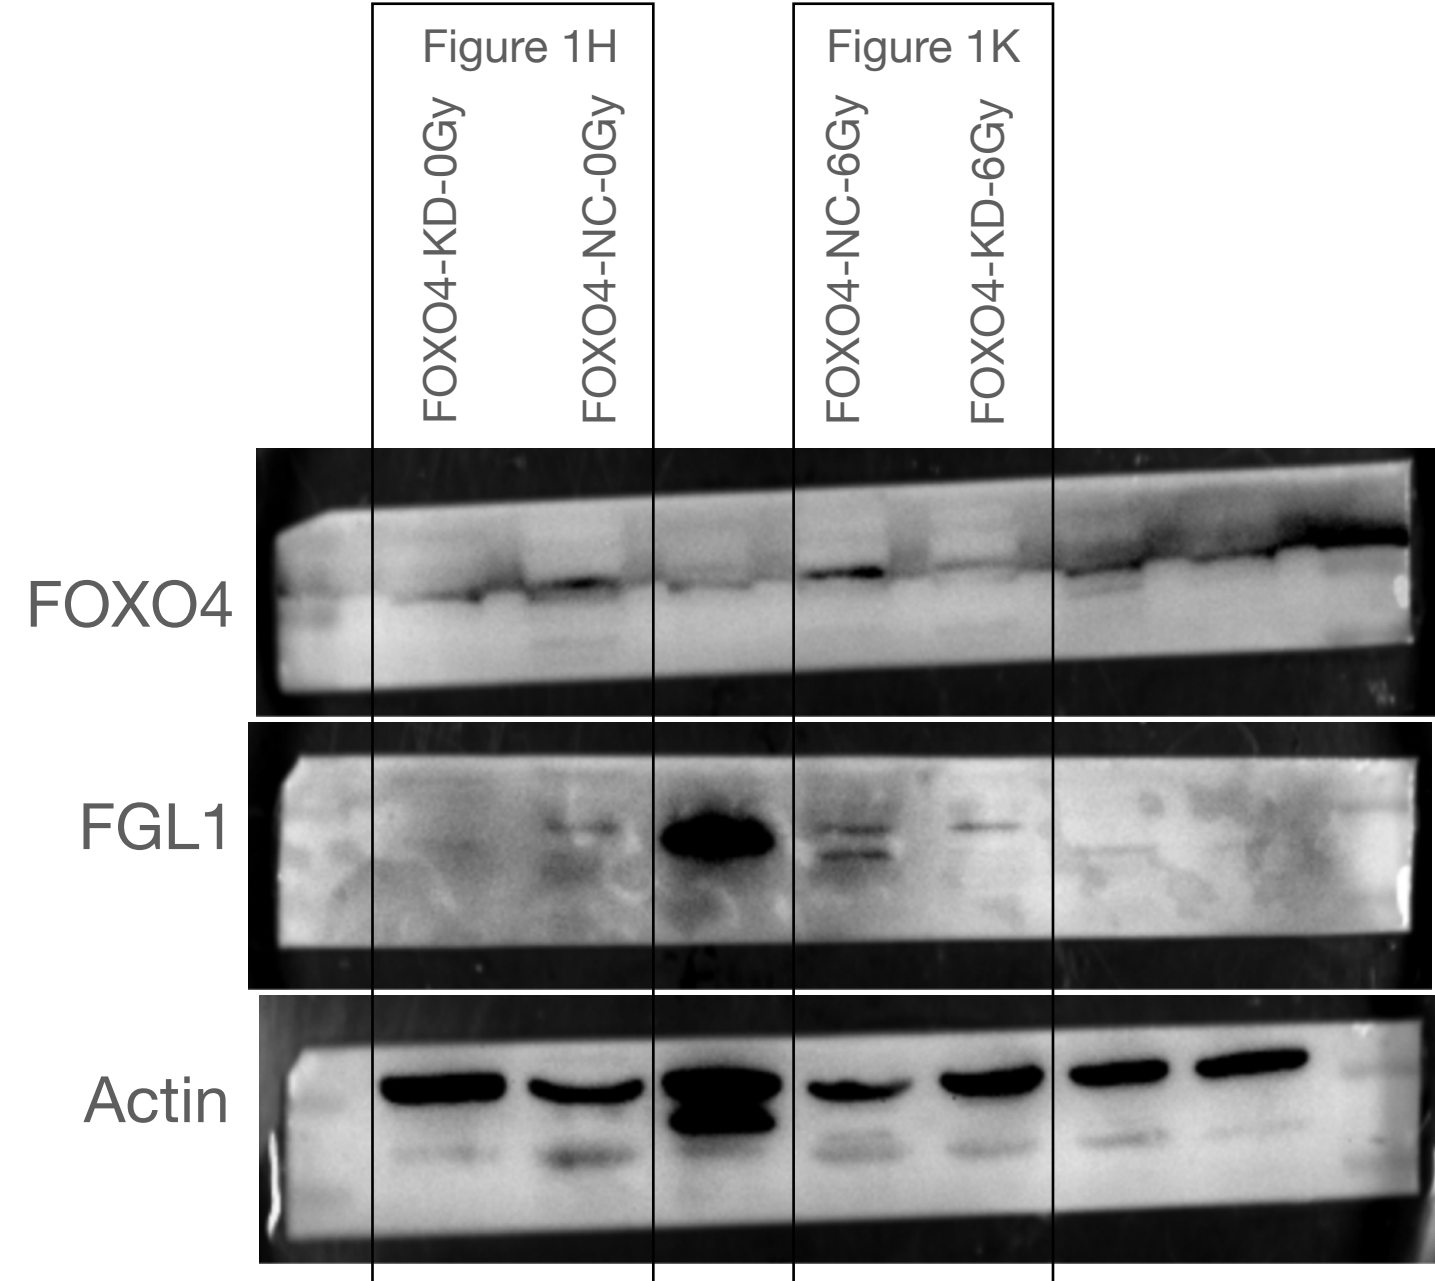

Figure 2A

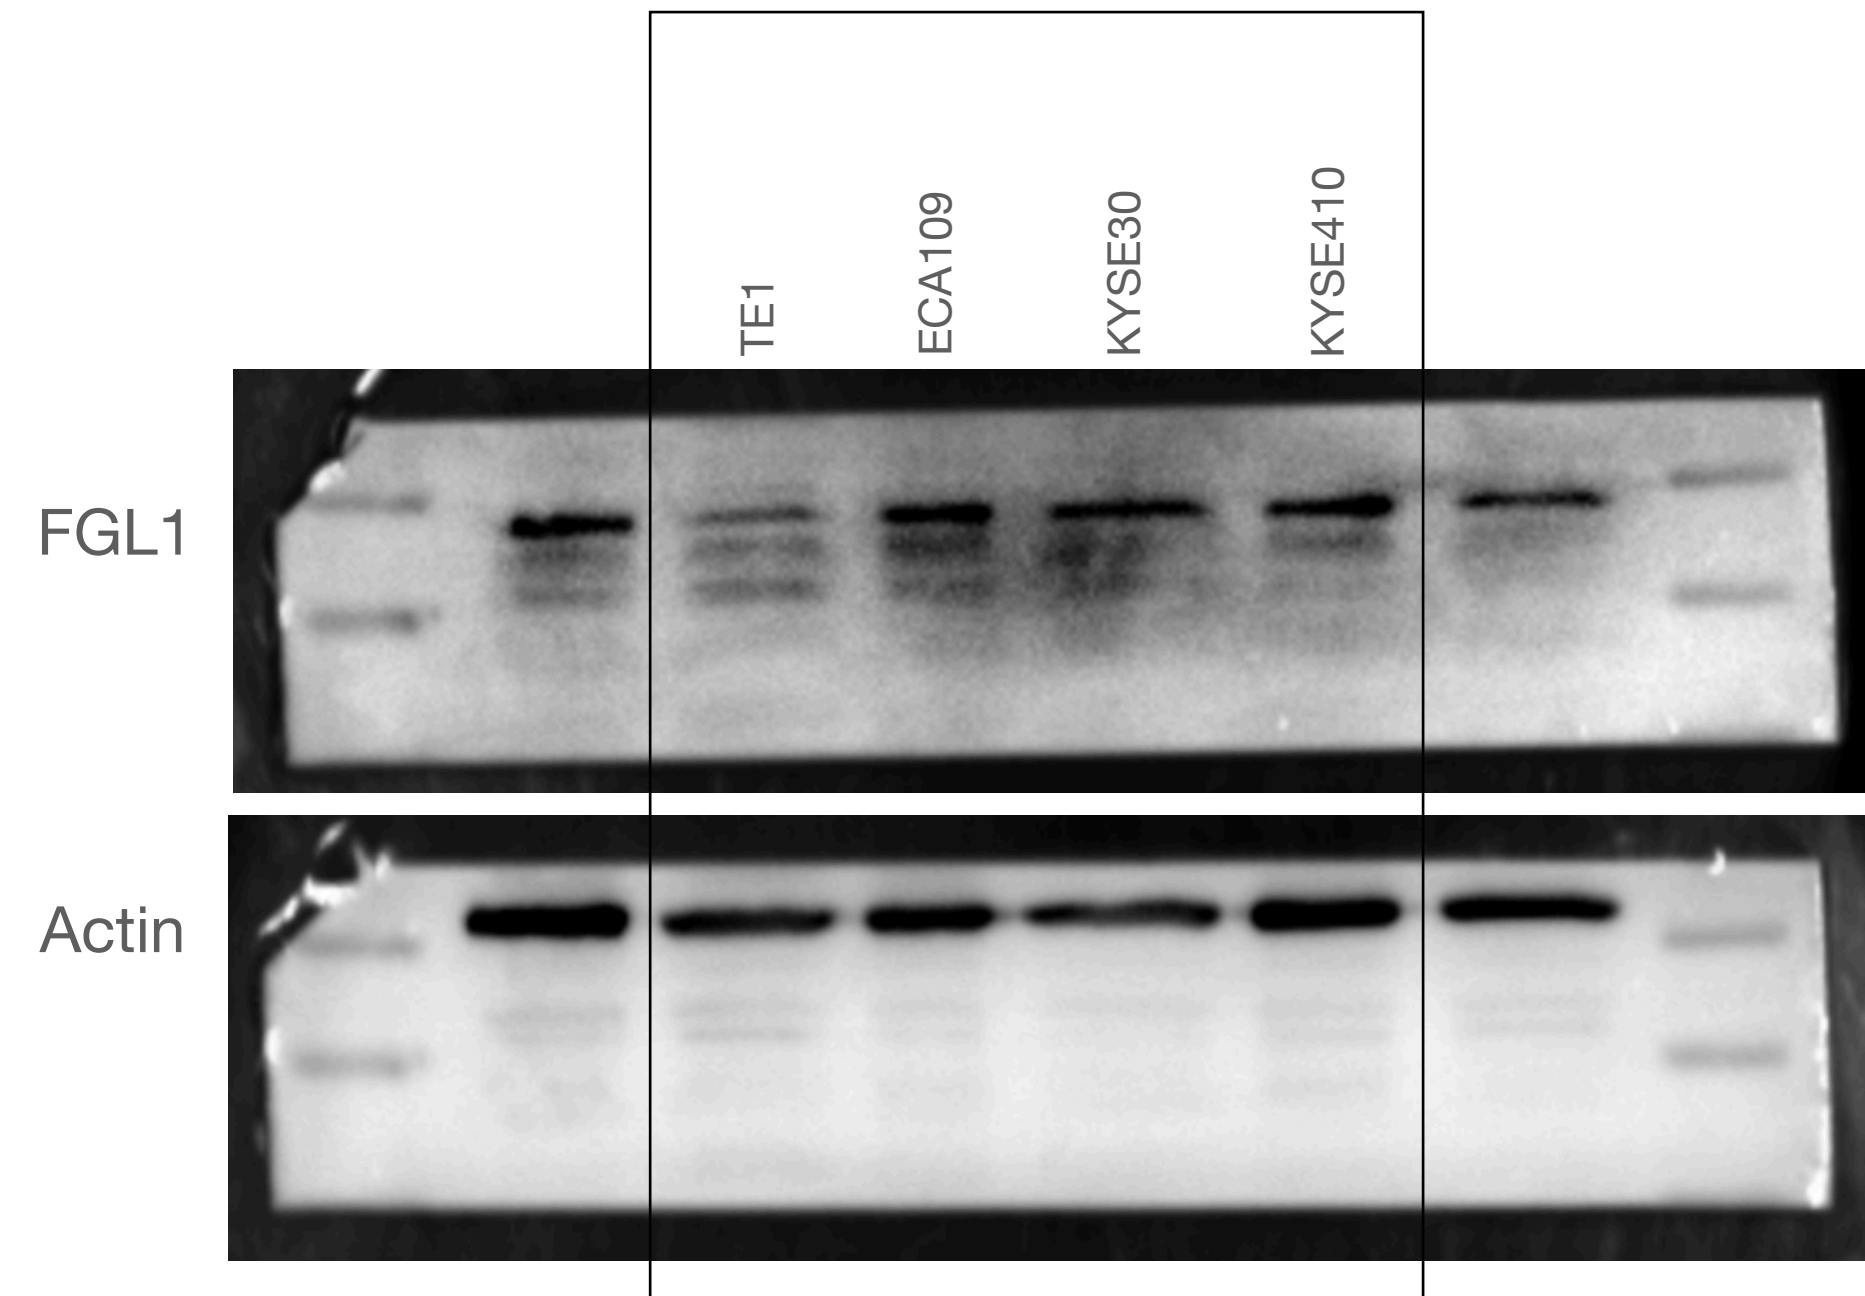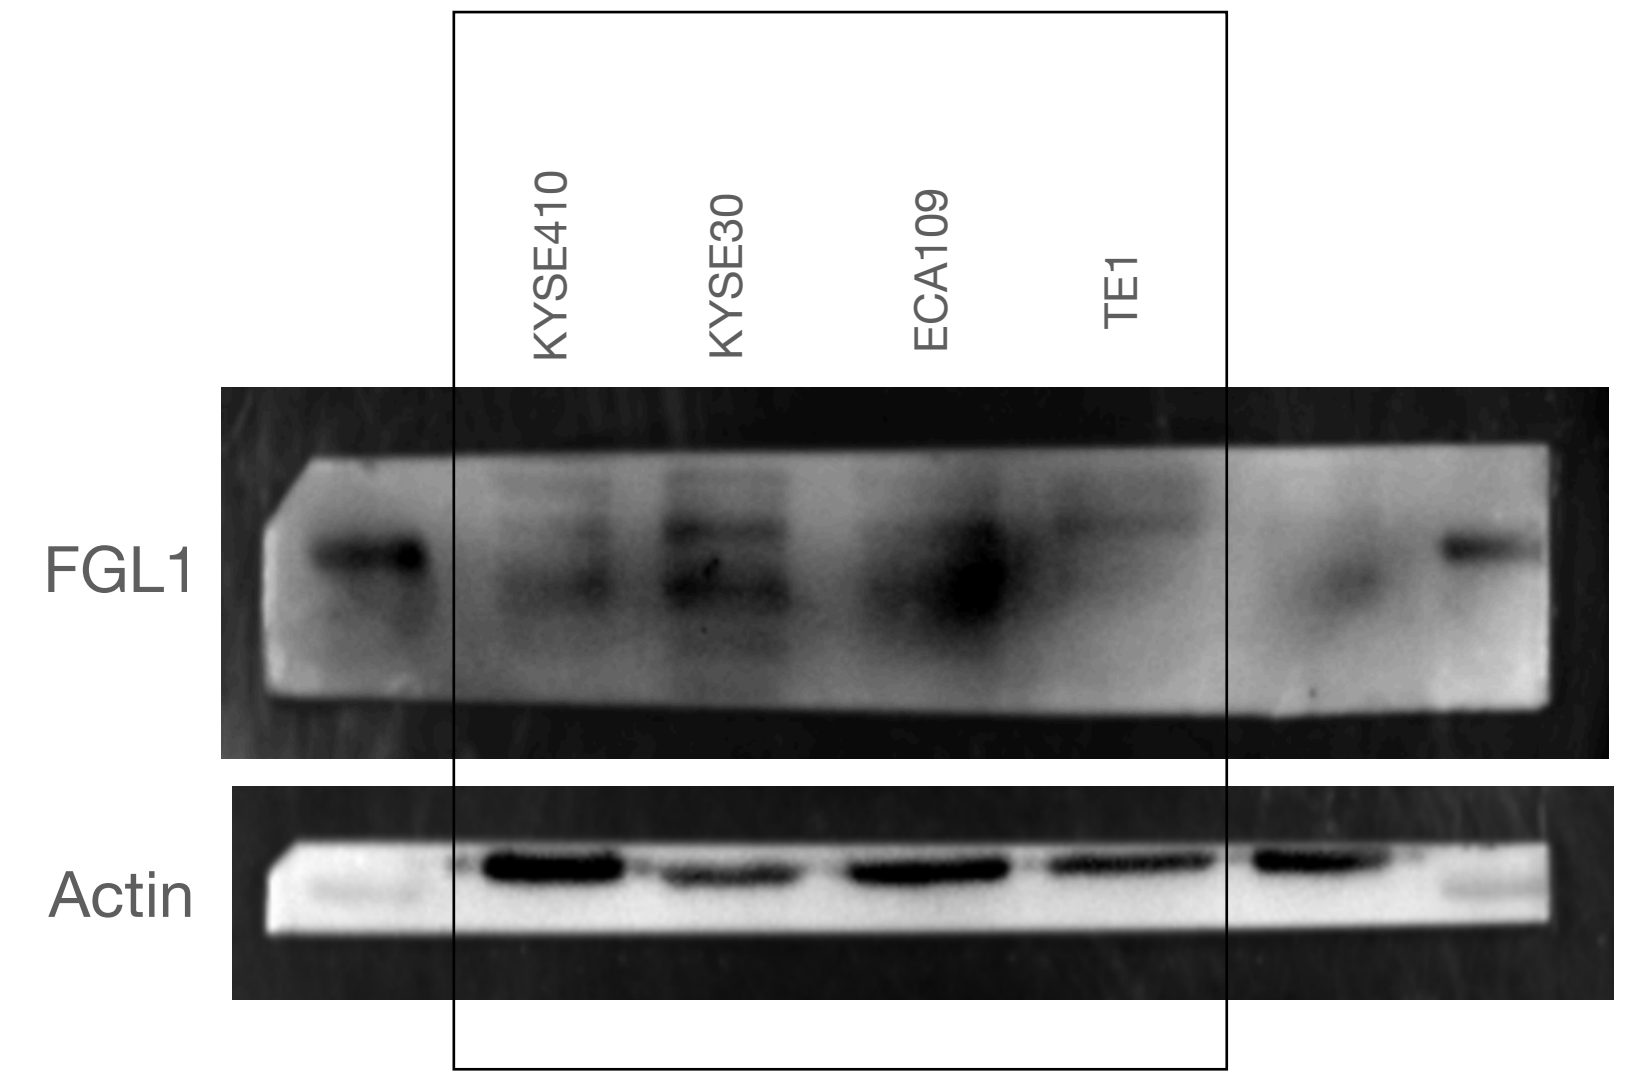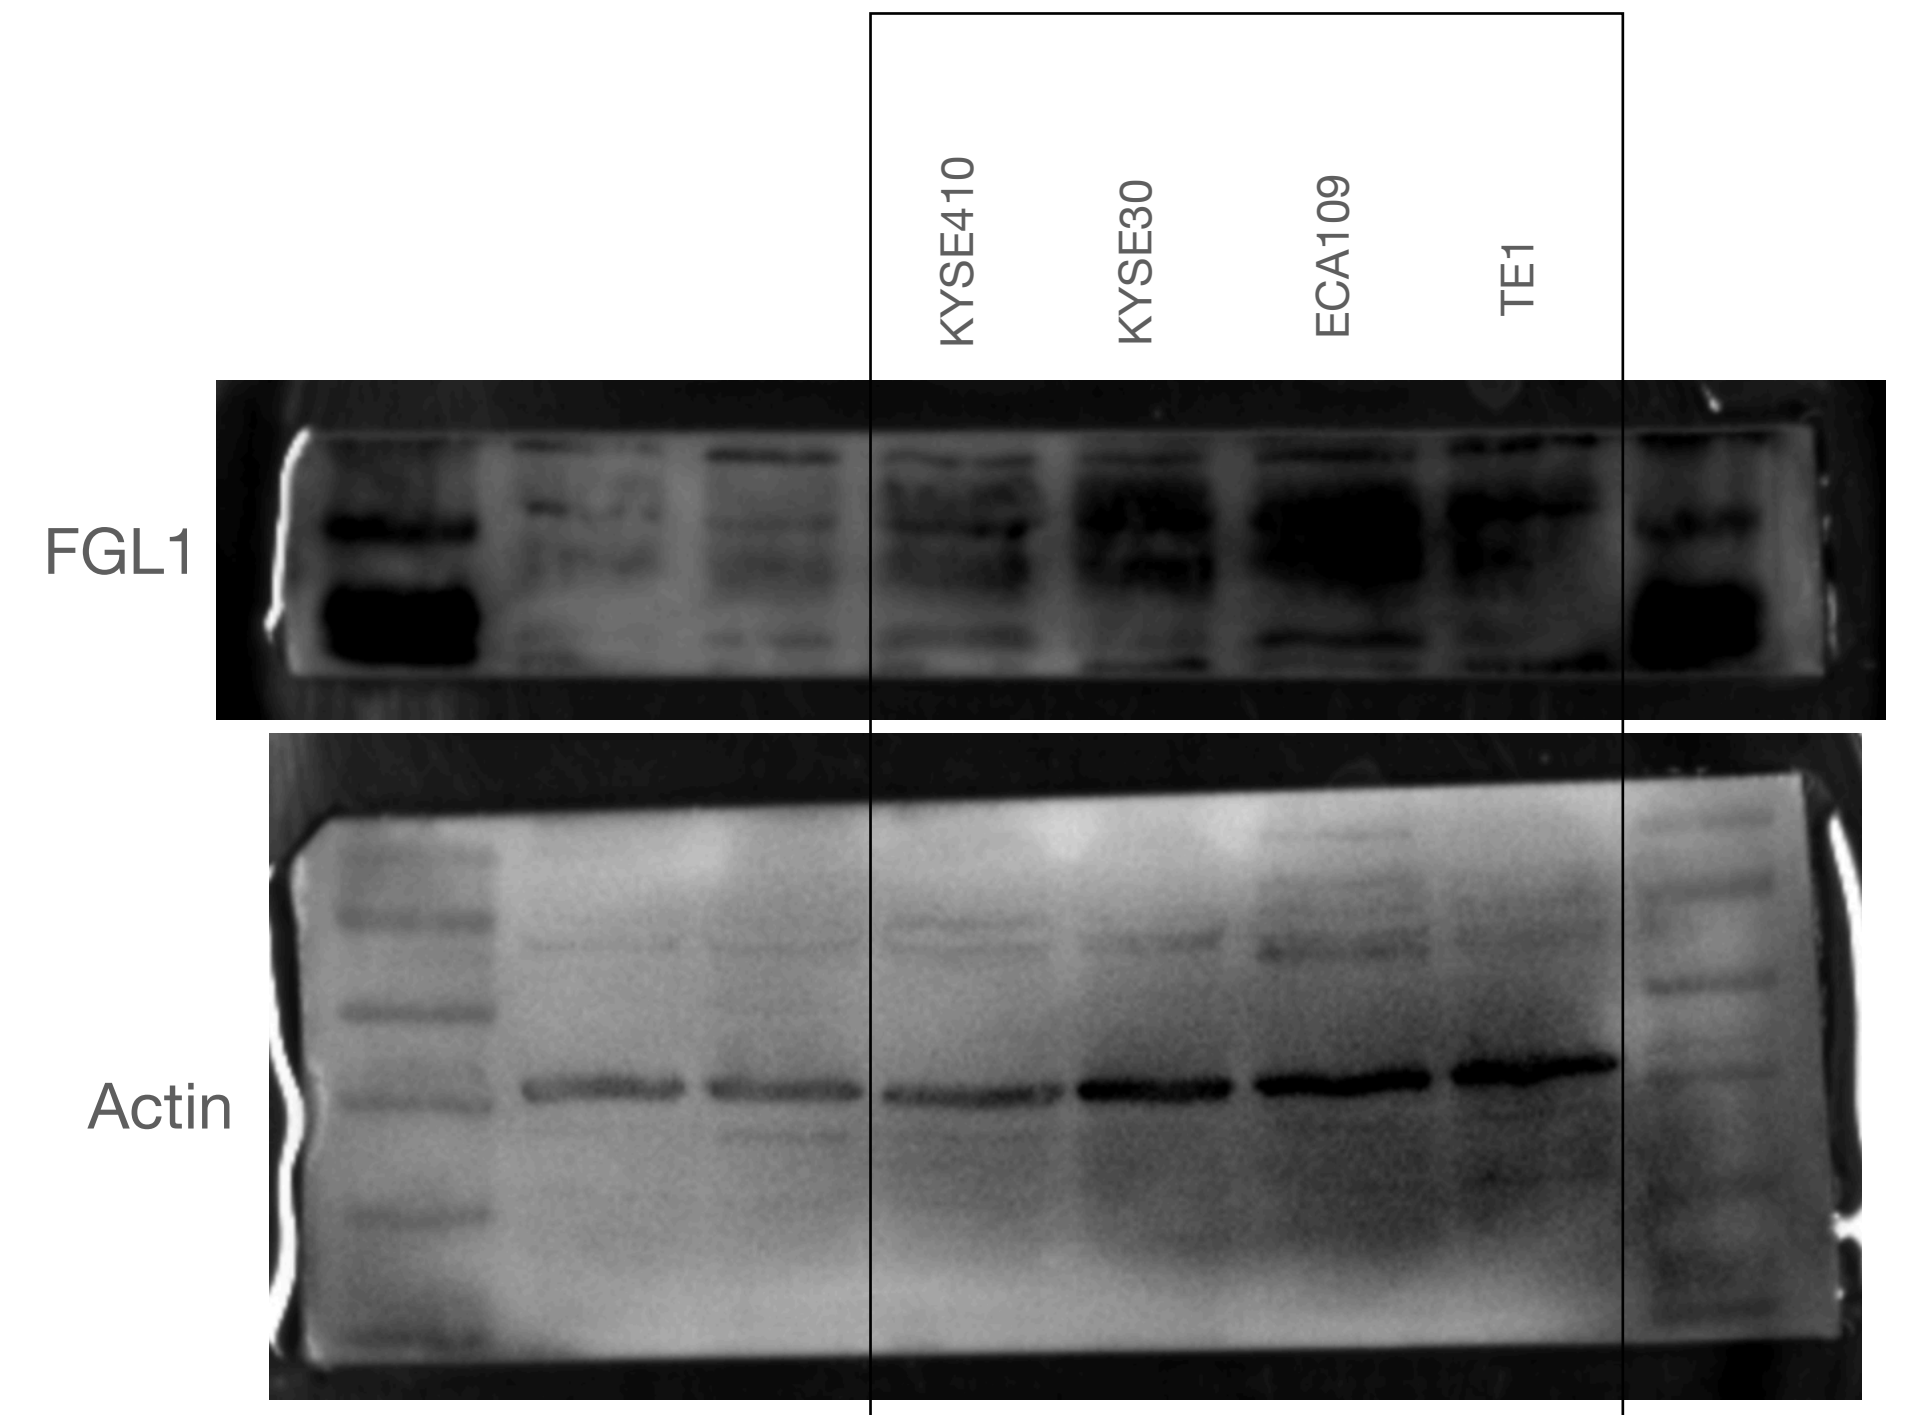

# Figure 2D and Figure 3B

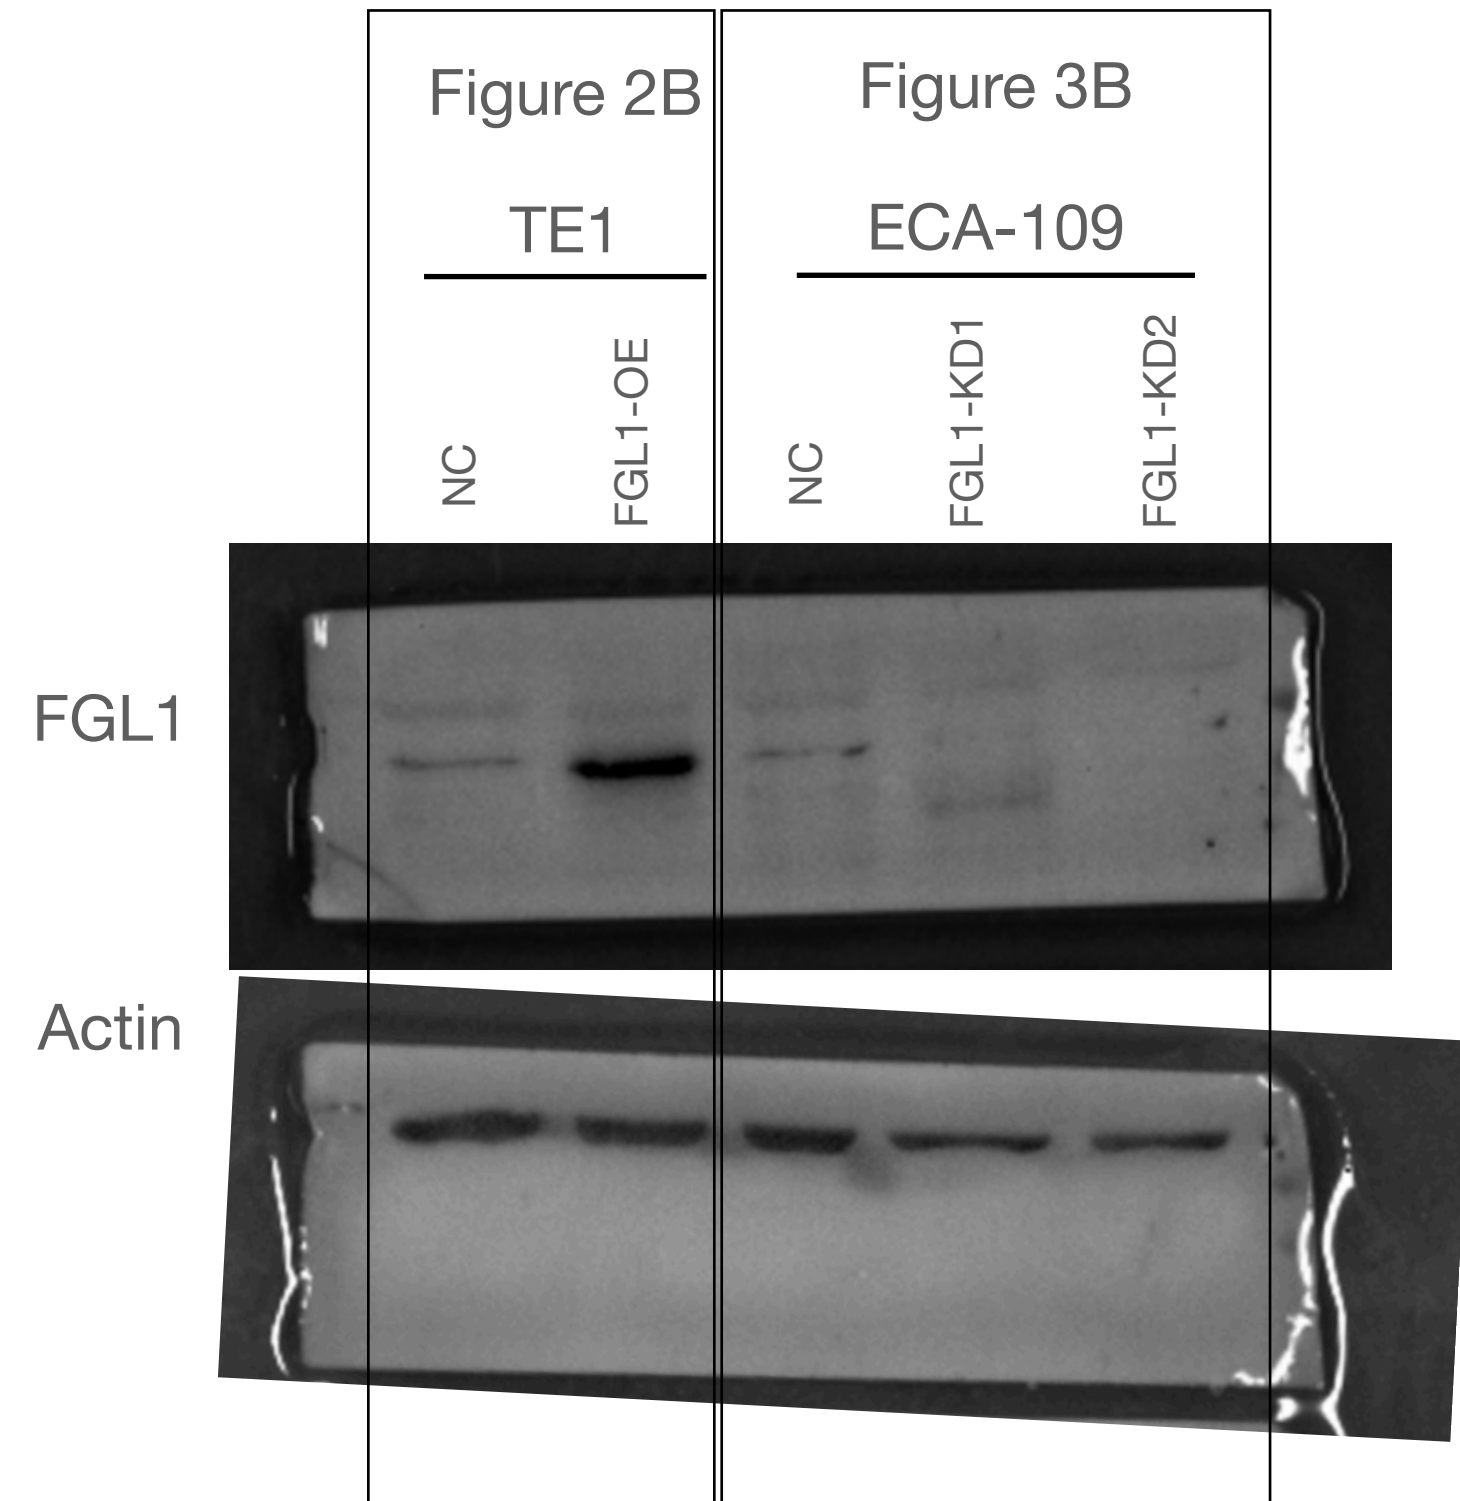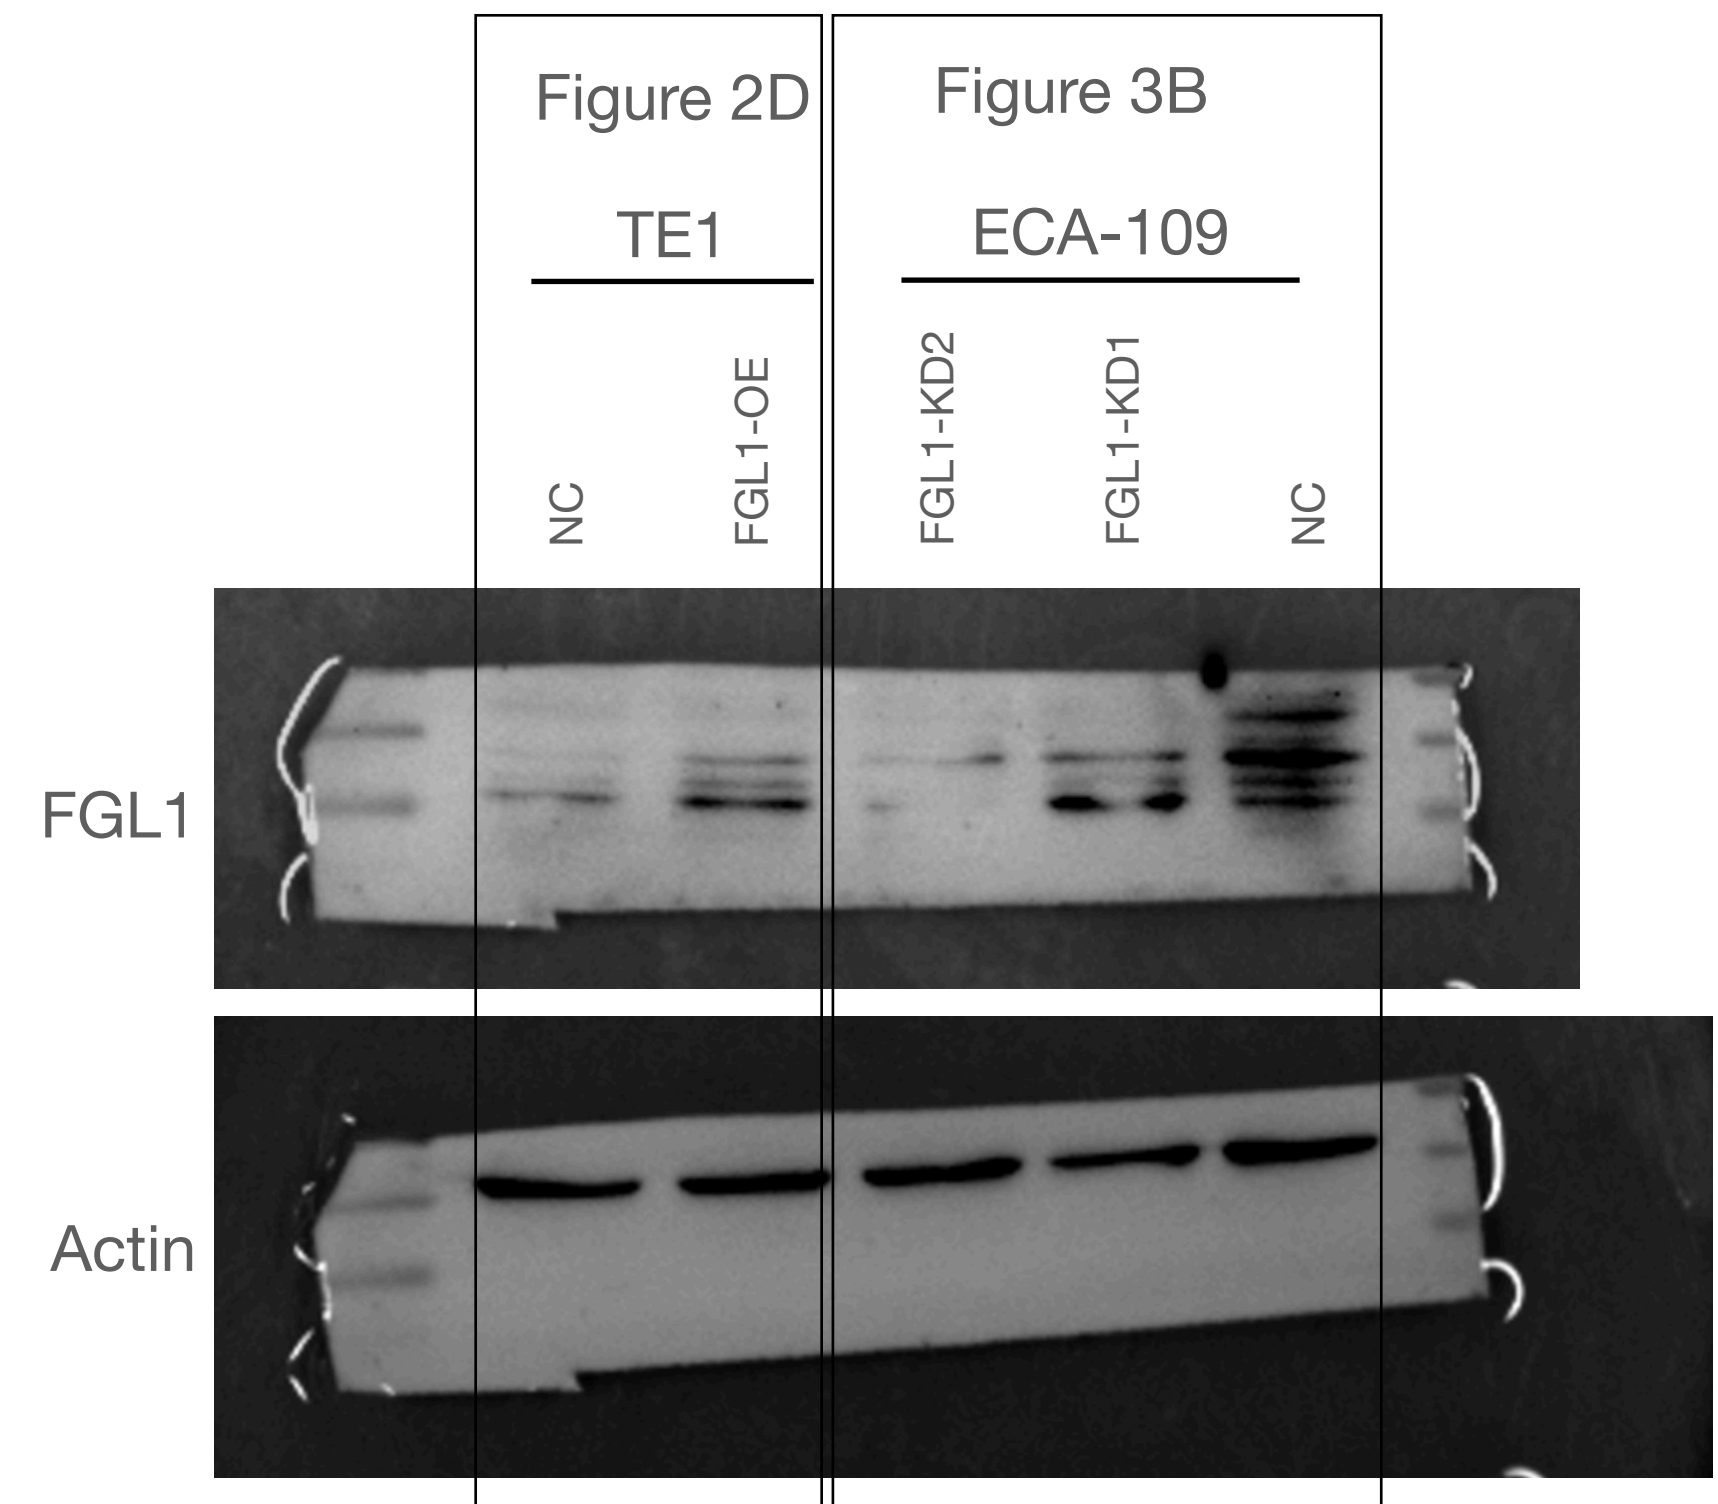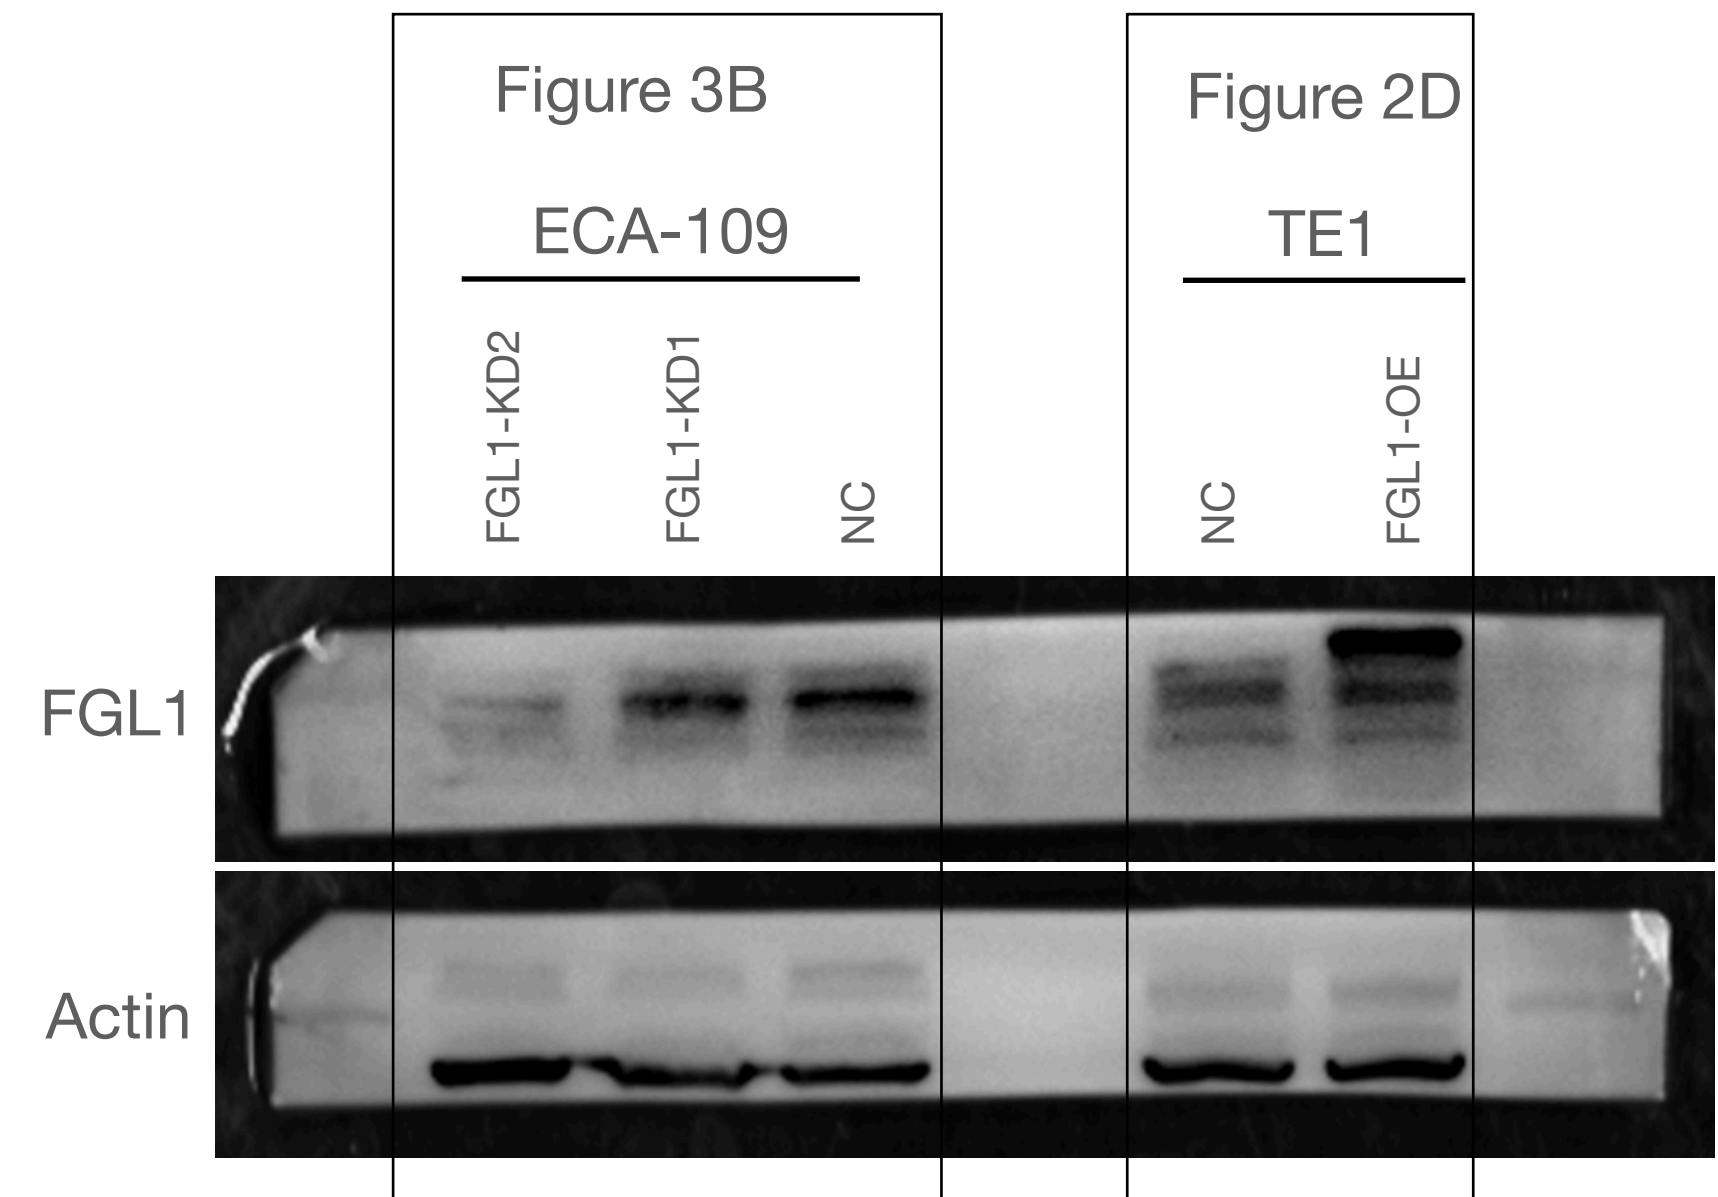

**Figure 4D and Figure 5B**

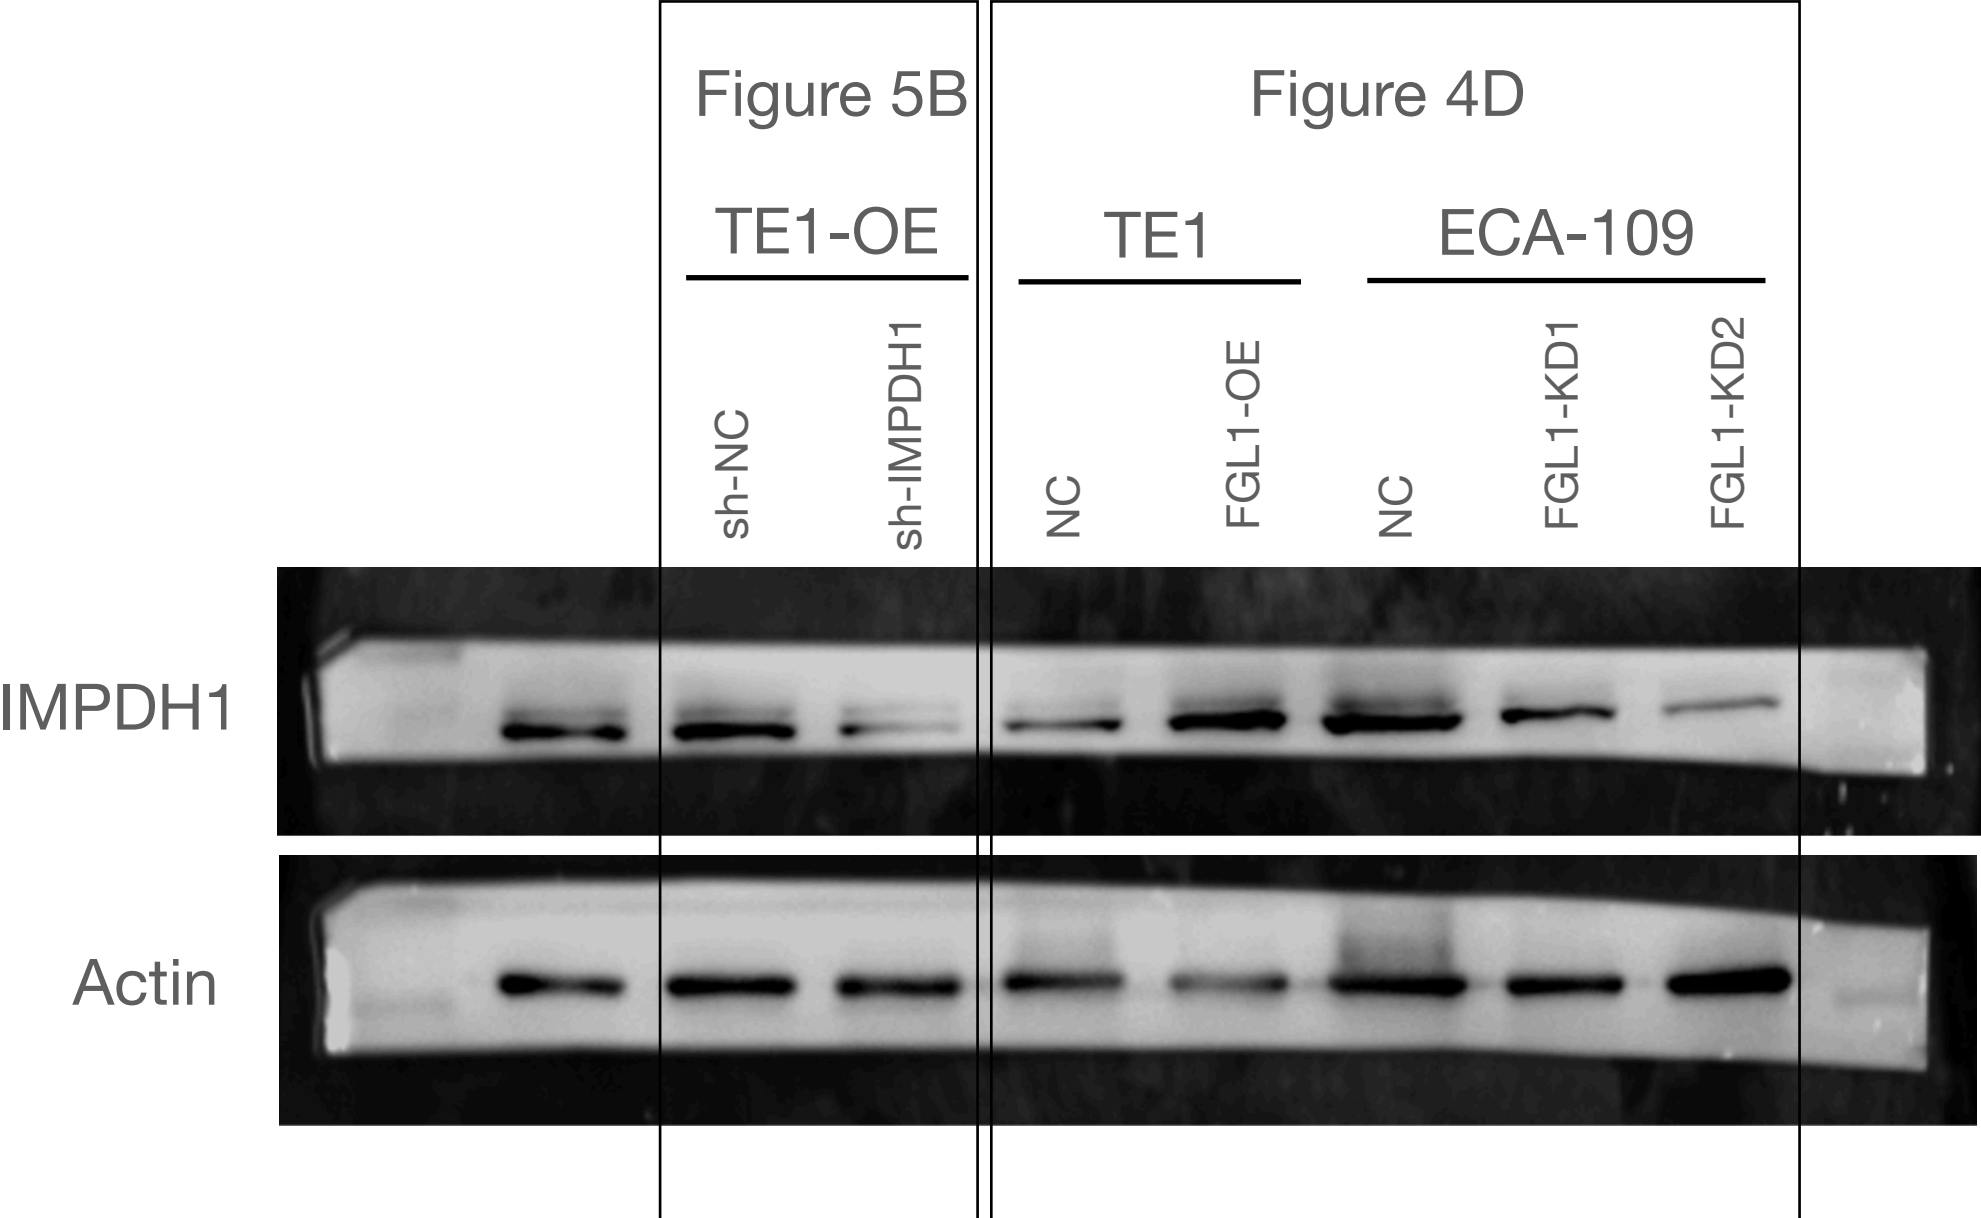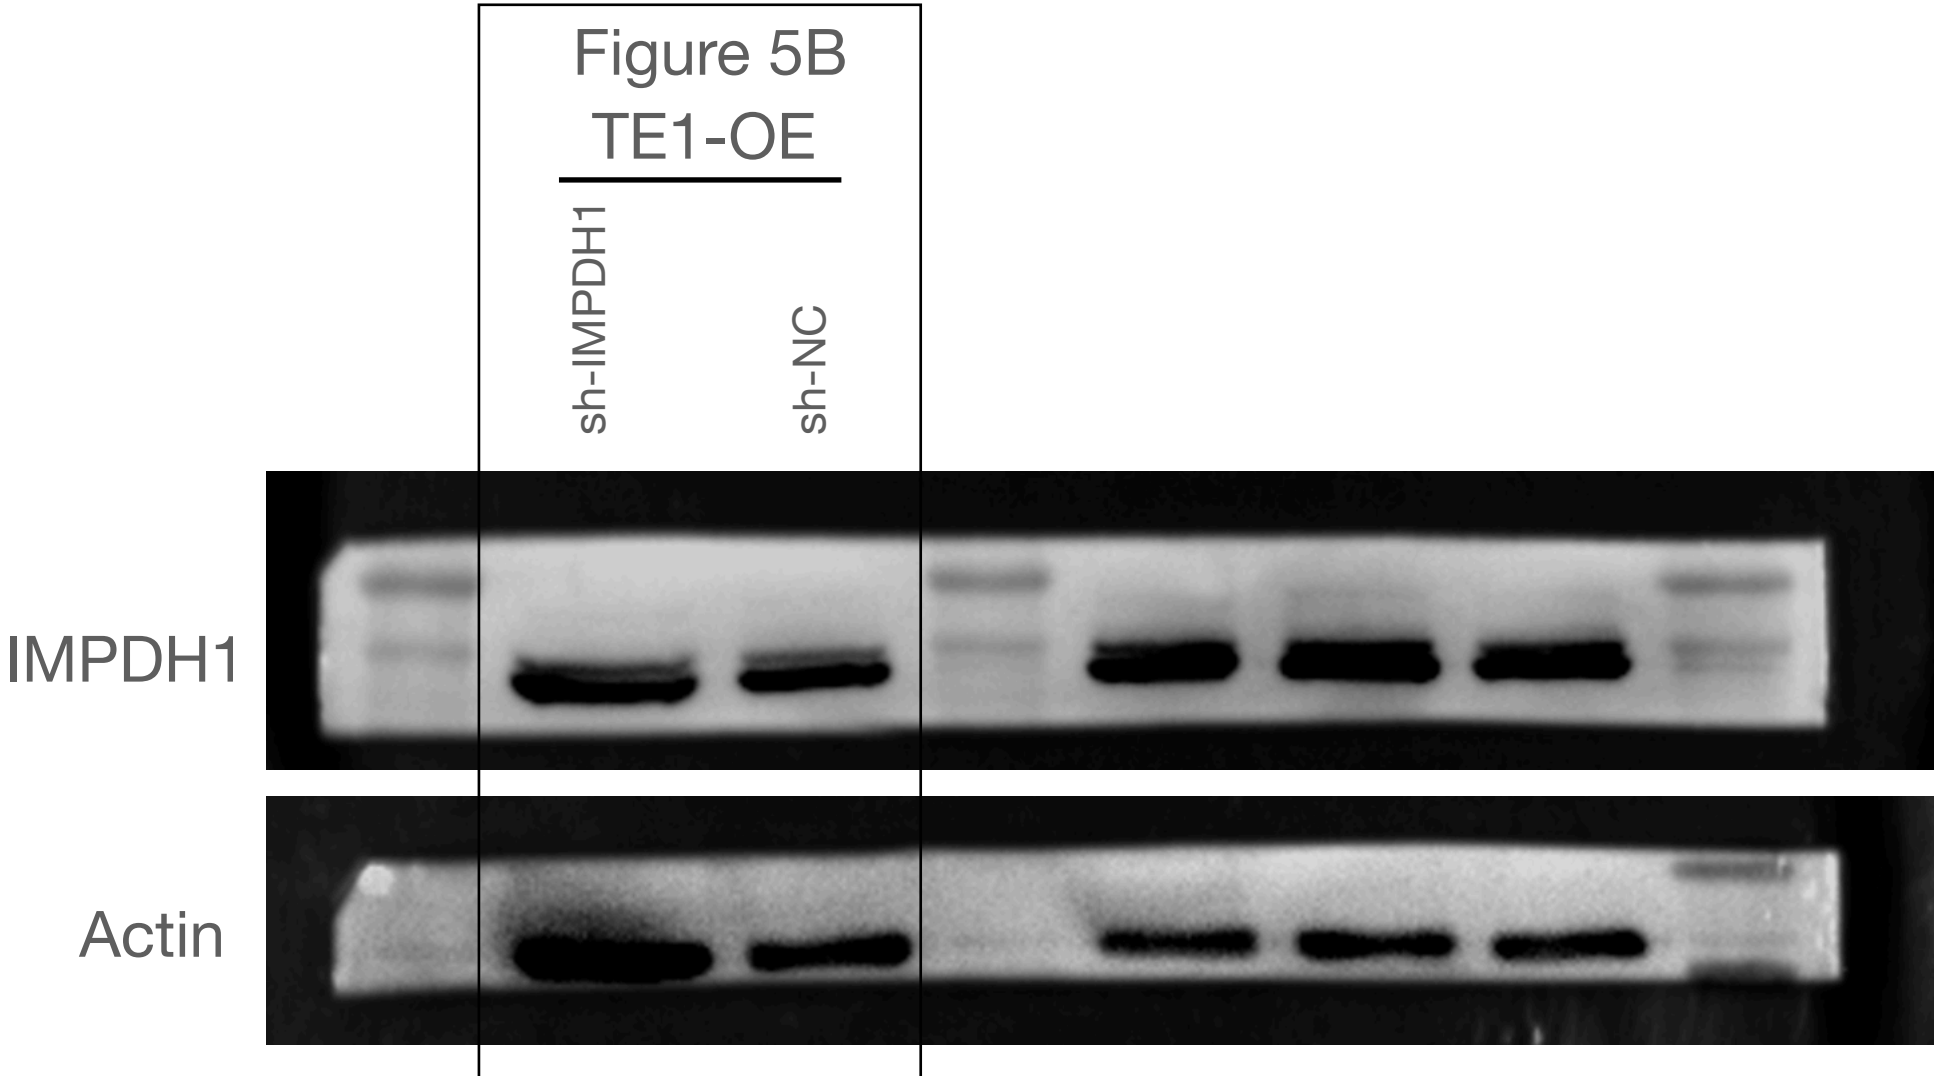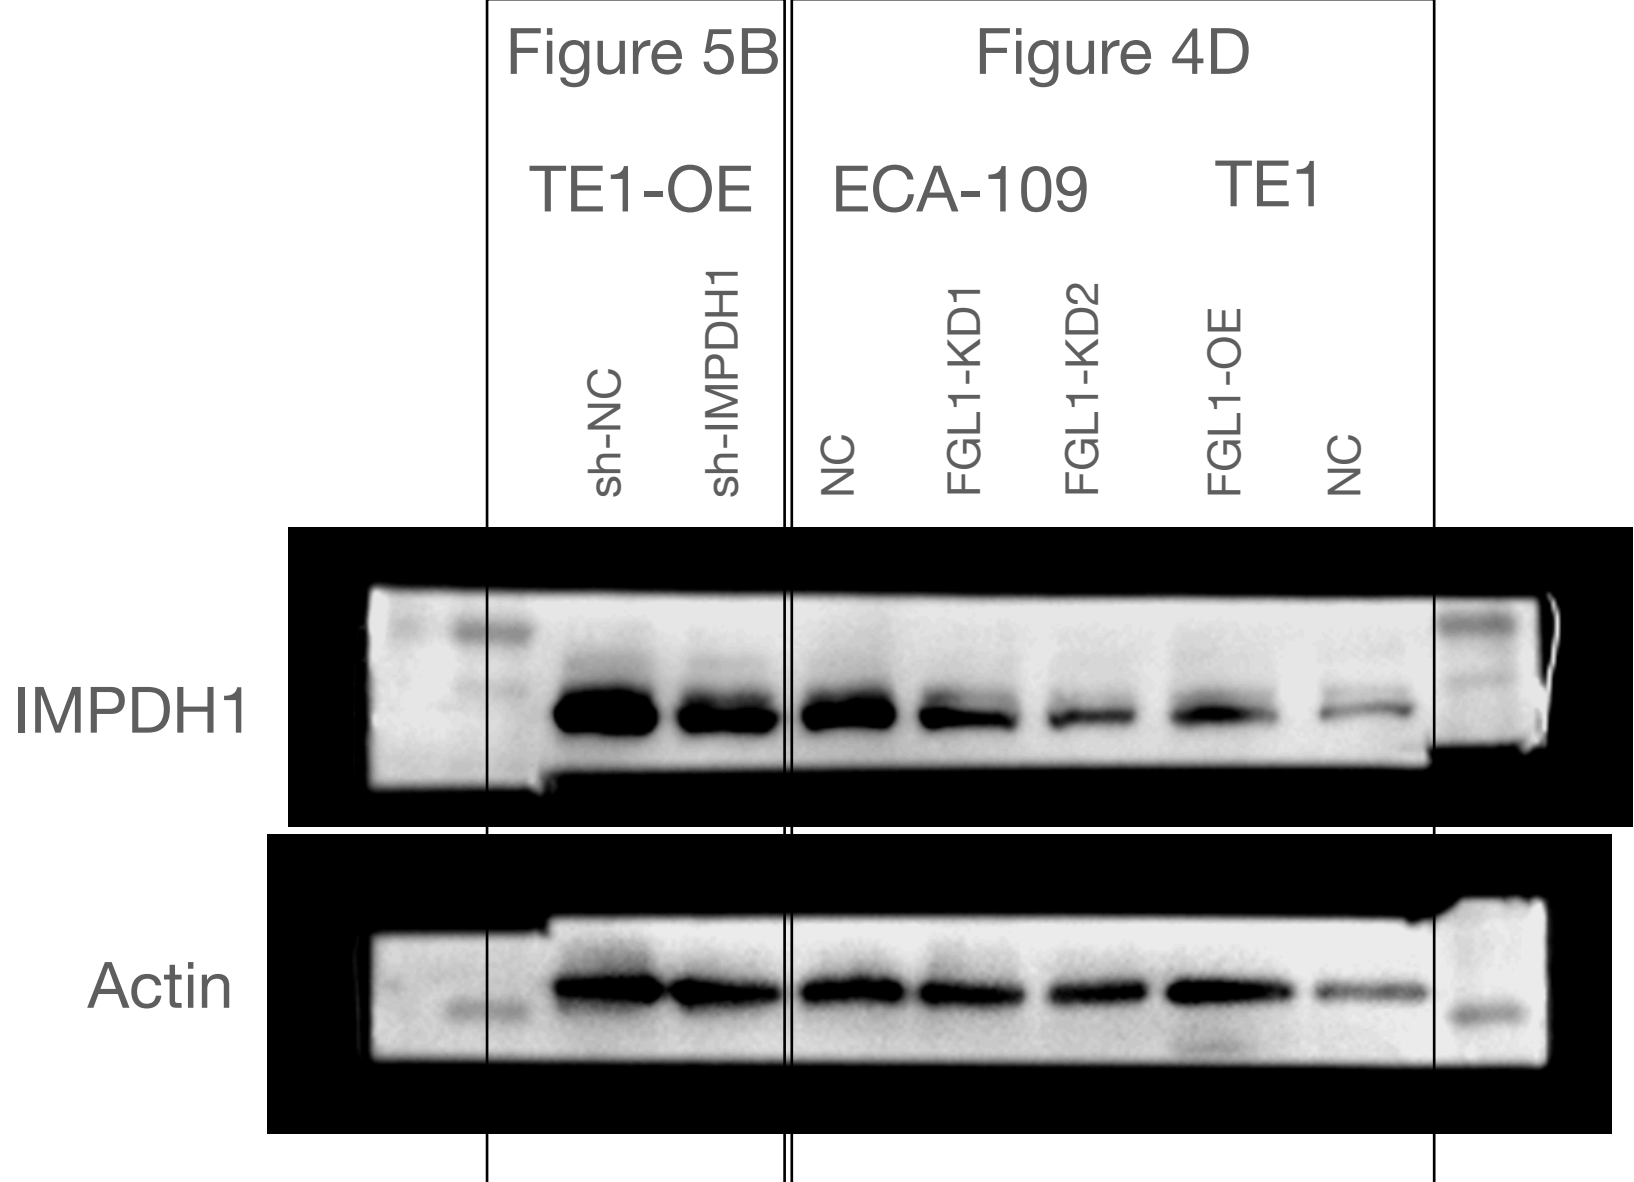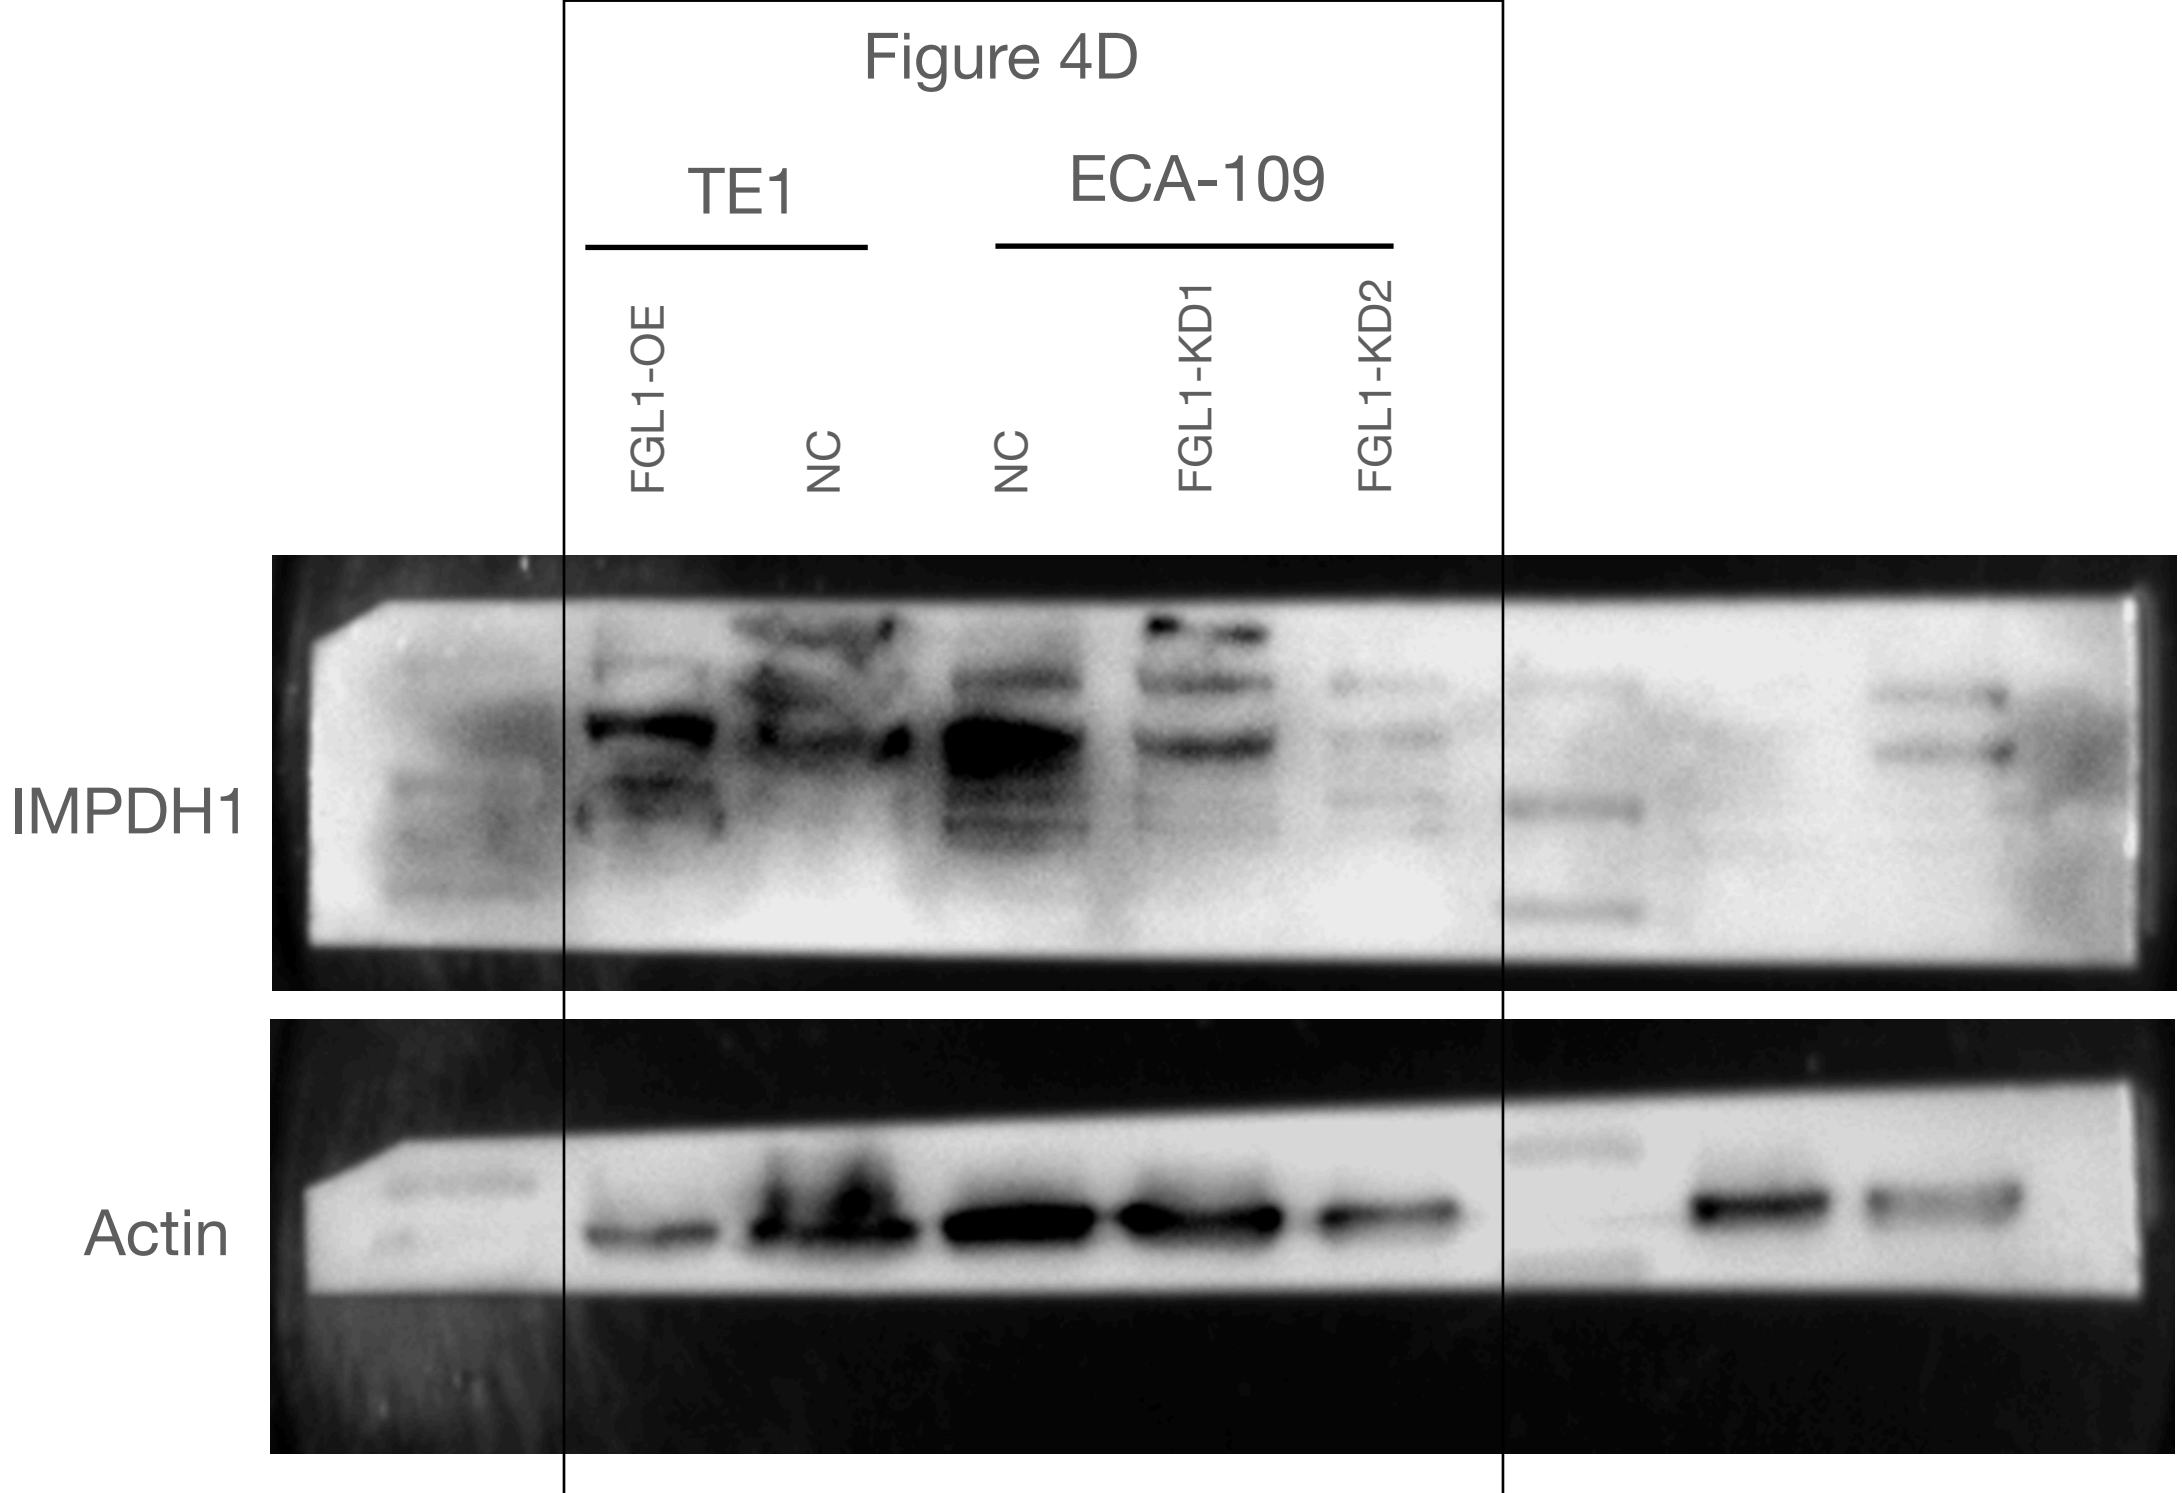

Figure 4G

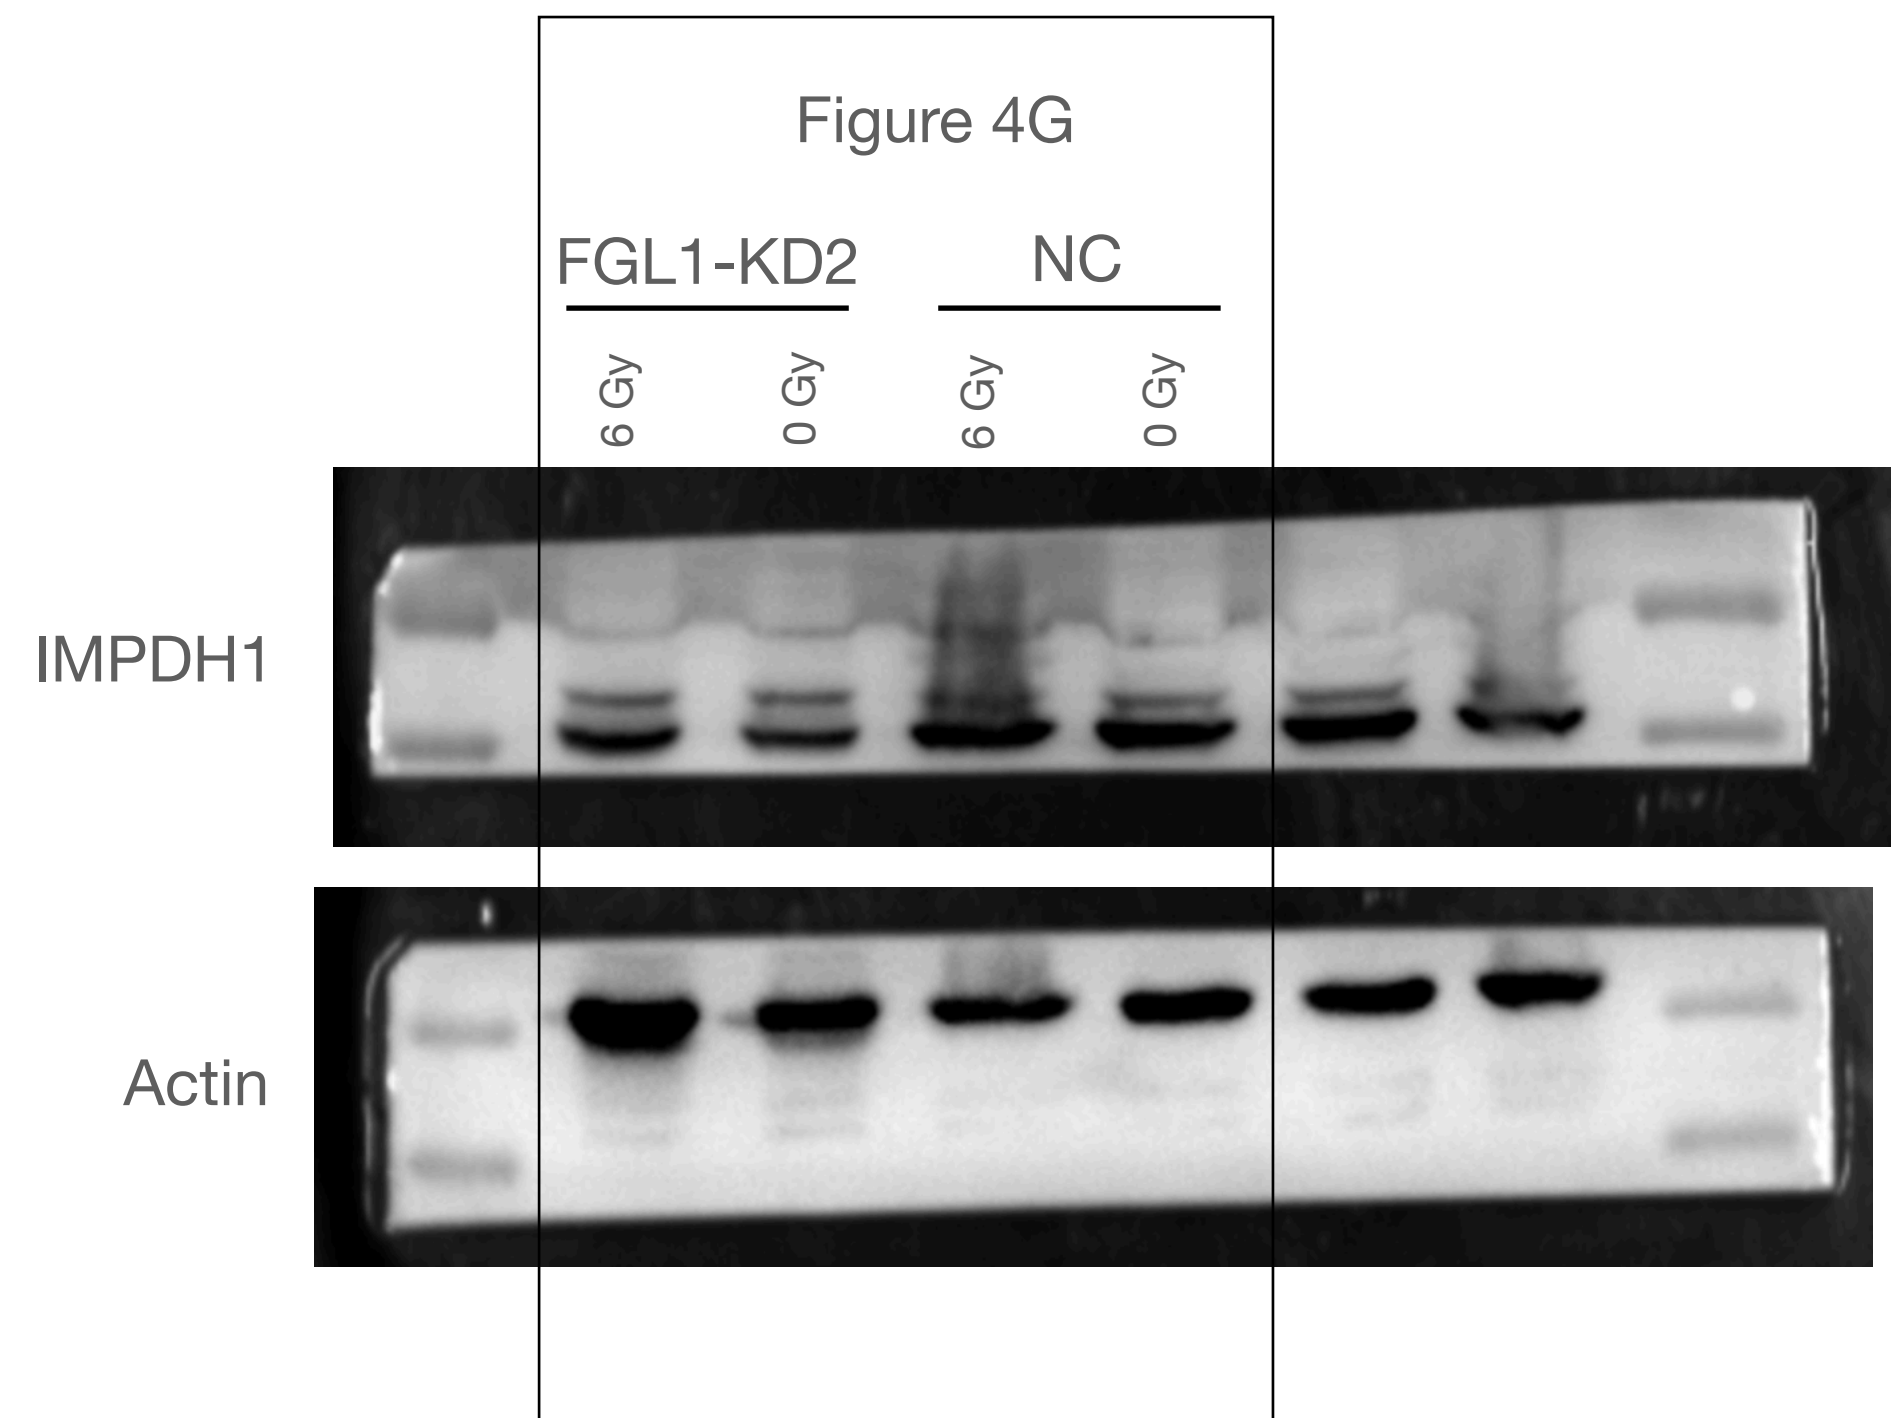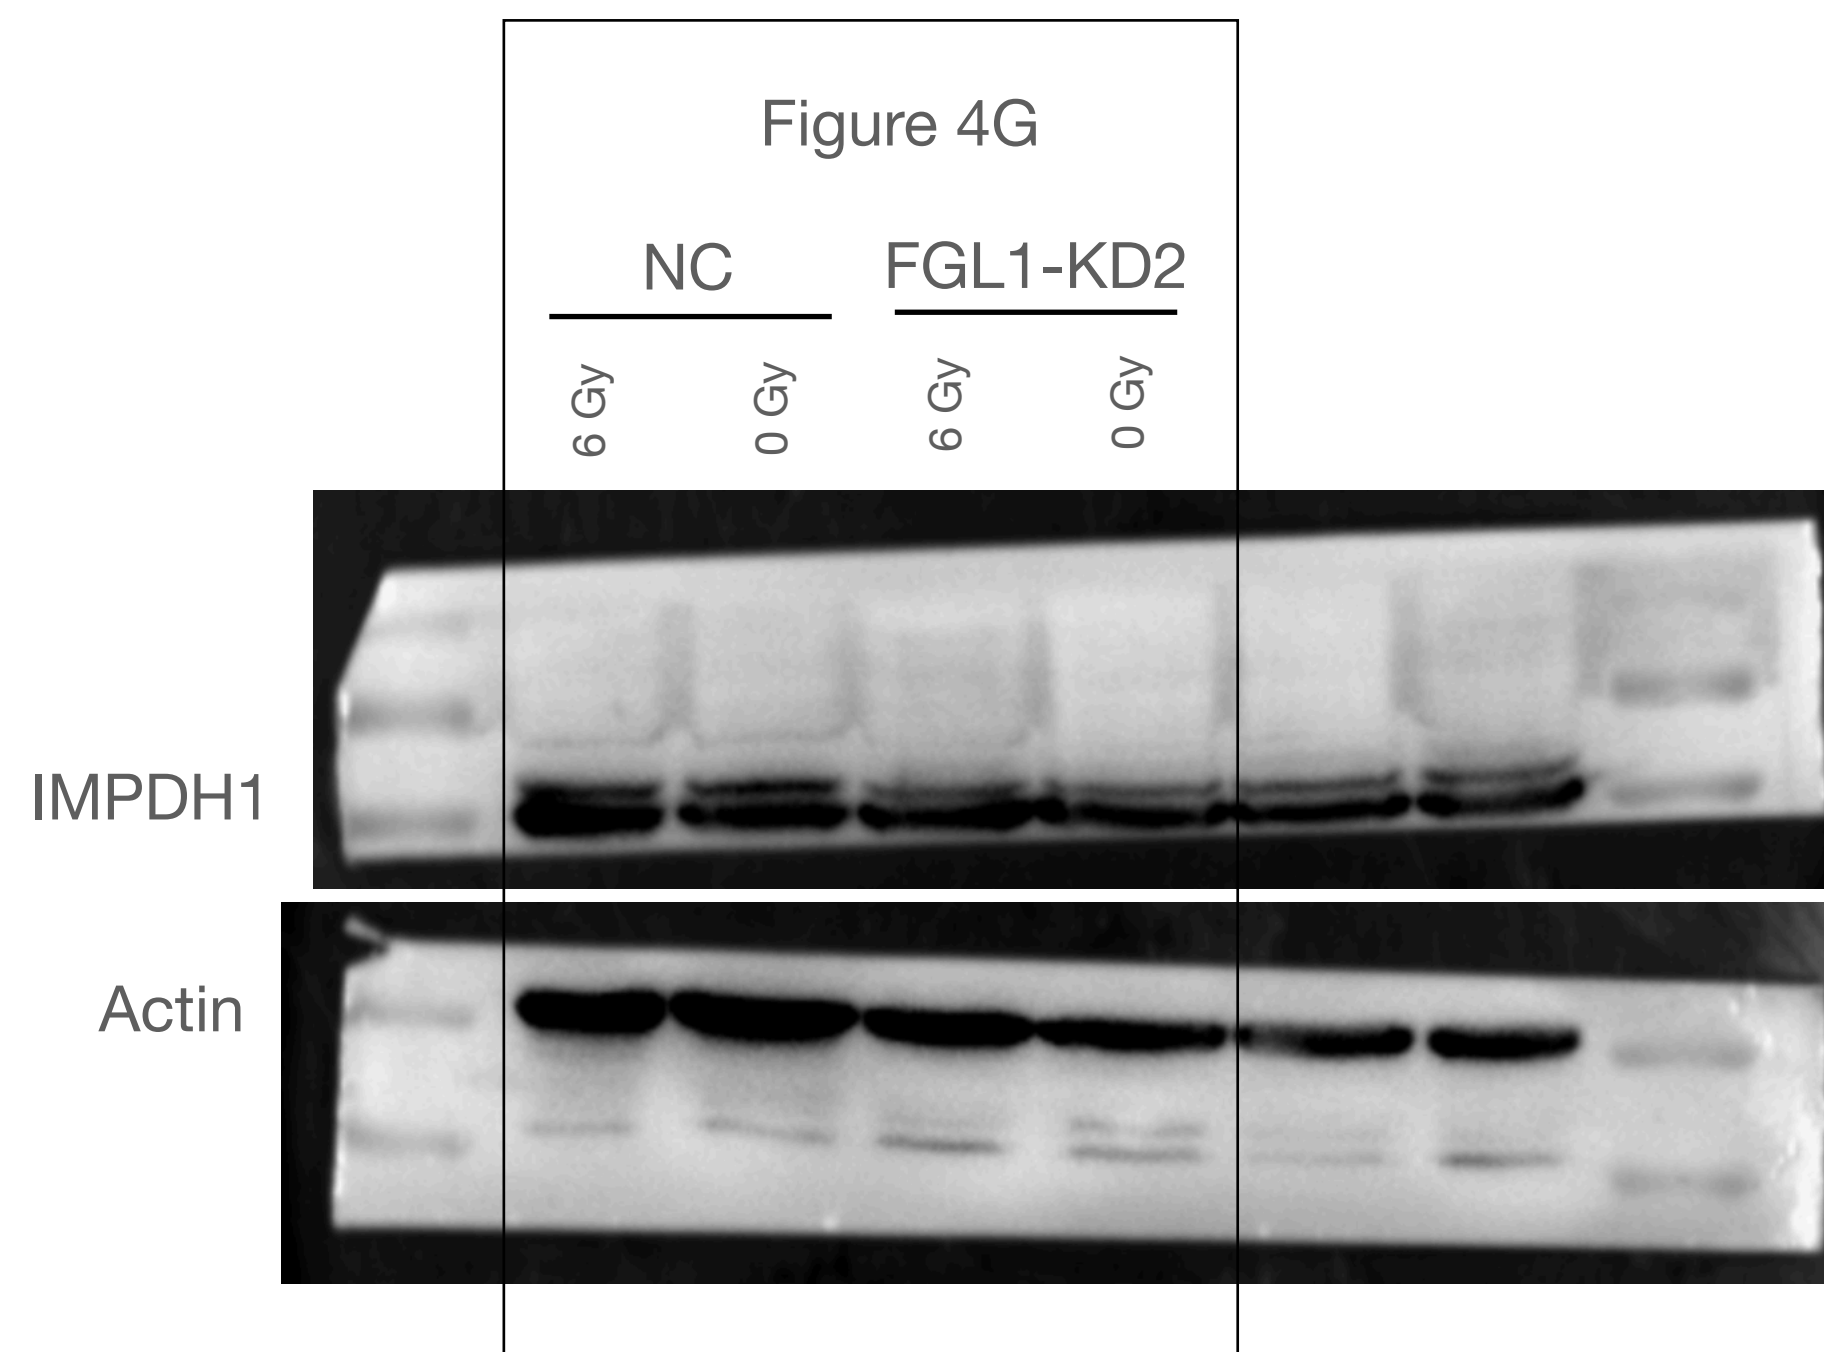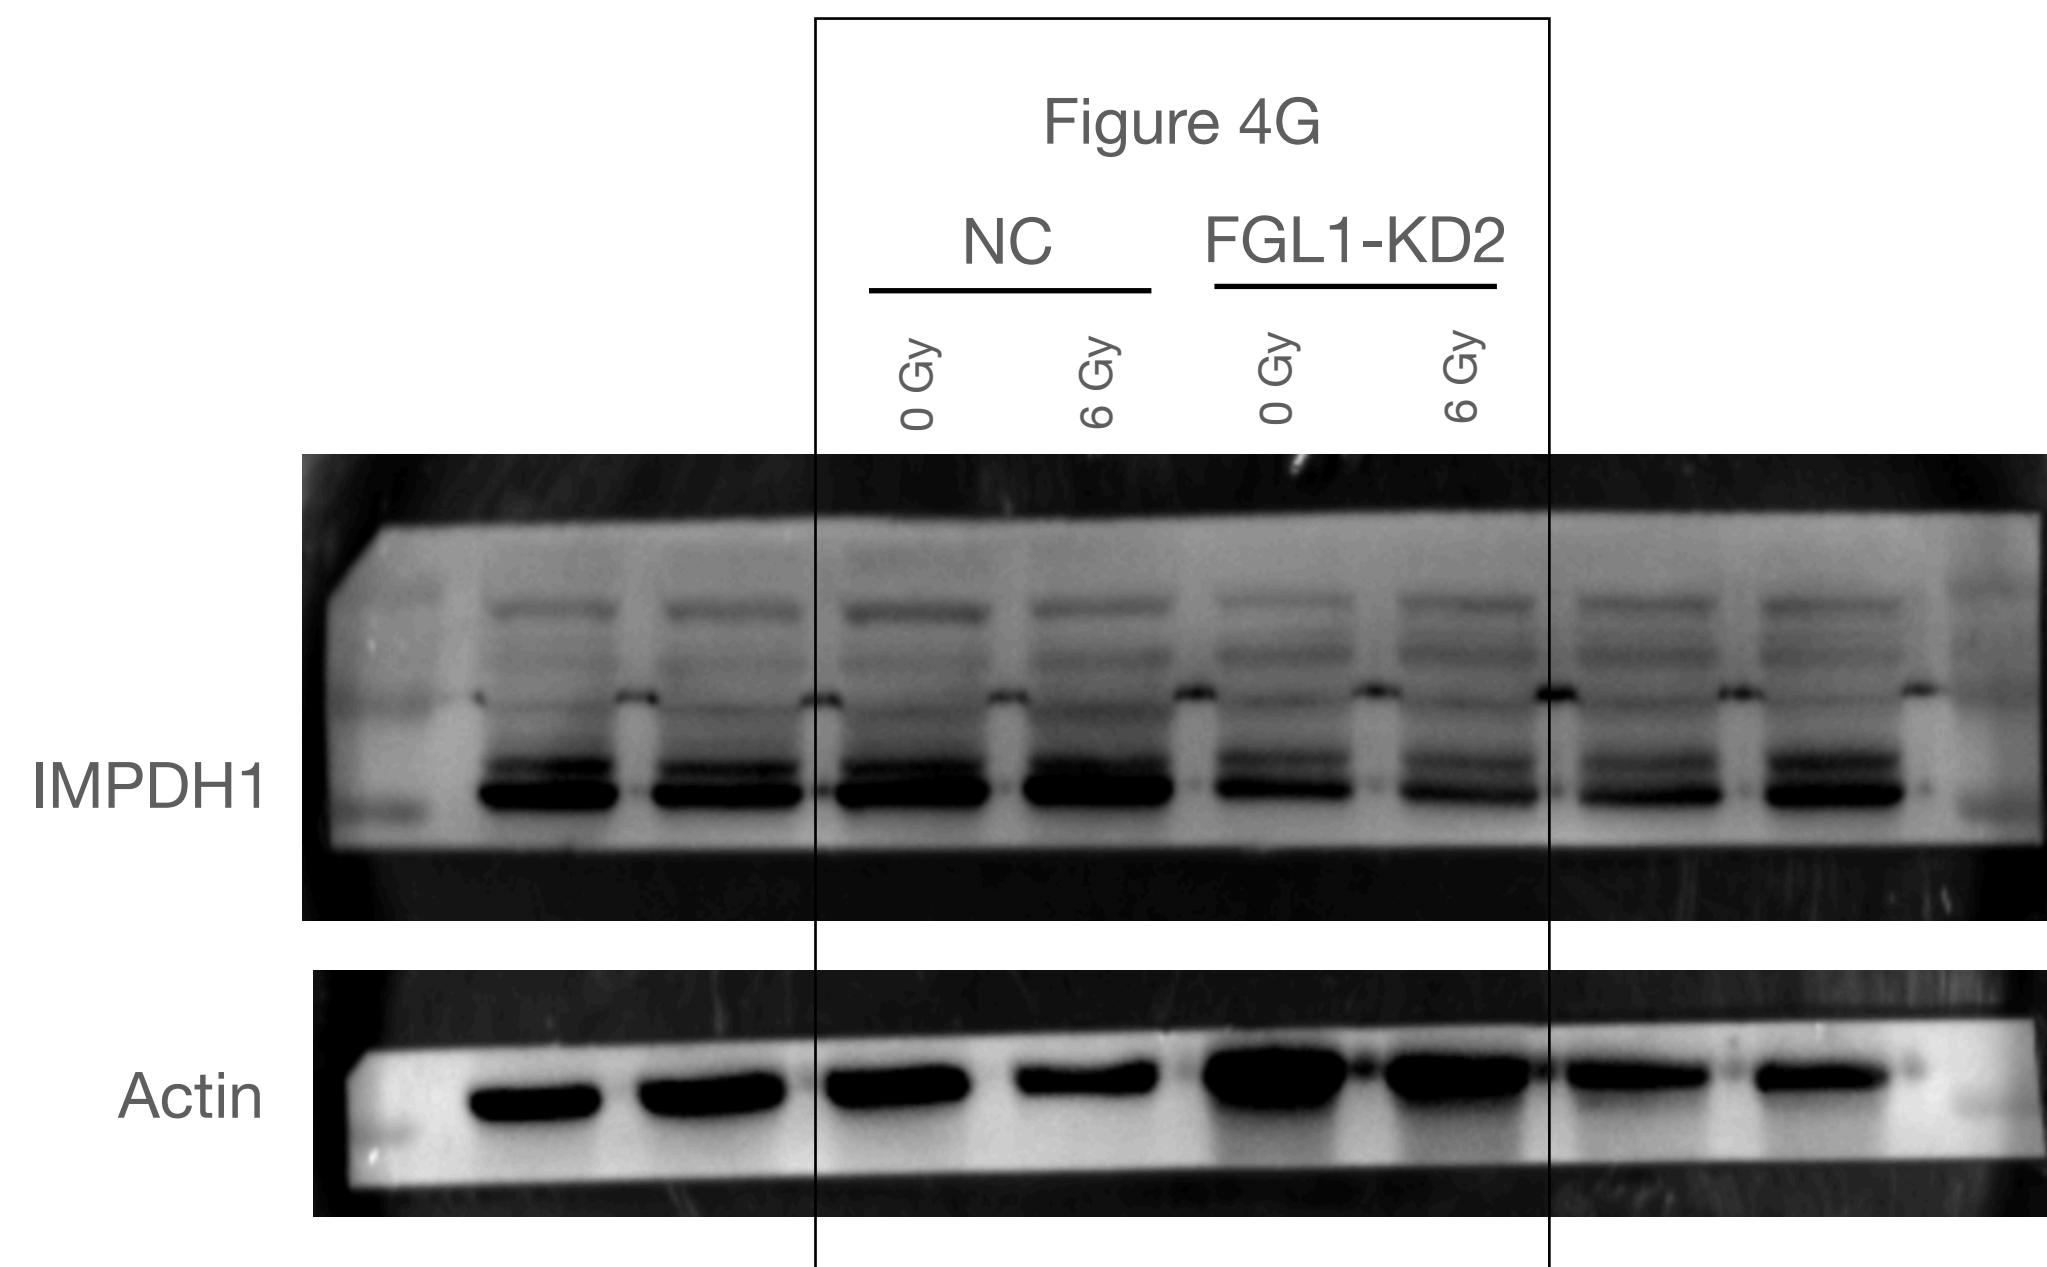

Supplement: 12885_2024_12313_MOESM2_ESM.pdf [file 12885_2024_12313_MOESM2_ESM.pdf]
