# Supplementary material for: Radiation-induced upregulation of FGL1 promotes esophageal squamous cell carcinoma metastasis via IMPDH1
Source: PubMed Central journal article supplement (PMC11067193; doi:10.1186/s12885-024-12313-7), 2024-05-03
Supplement: 12885_2024_12313_MOESM1_ESM.pdf [file 12885_2024_12313_MOESM1_ESM.pdf]

**Table S1.** Primer sequences used for qPCR.

| Gene           |                | Sequence(5'-3')       |
|----------------|----------------|-----------------------|
| <i>FGL1</i>    | forward primer | CCTTGTTACCACCGCTCTGA  |
|                | reverse primer | TGGGCTCTGGAGAGGTTTGA  |
| <i>IMPDH1</i>  | forward primer | CAGCAGGTGTGACGTTGAAAG |
|                | reverse primer | AGCTCATCGCAATCATTGACG |
| <i>FOXO4</i>   | forward primer | GGAATGCCTGGGGAAATCAG  |
|                | reverse primer | TTGTGGCGGATCGAGTTCTT  |
| <i>β-Actin</i> | forward primer | CTCCATCCTGGCCTCGCTGT  |
|                | reverse primer | GCTGTACCTTCACCGTTCC   |

**Table S2.** Sequences of shRNA.

| Name        | Sequence(5'-3')                                                | Lentiviral vector |
|-------------|----------------------------------------------------------------|-------------------|
| sh-IMPDH1#1 | CCGGCCTGAAGAAGAACCGAGACTACTCGAG<br>TAGTCTCGGTTCTTCTTCAGGTTTTTG | GV248             |
| sh-IMPDH1#2 | CCGGGTGACGTTGAAAGAGGCAAATCTCGAG<br>ATTTGCCTCTTTCAACGTCACTTTTTG | GV248             |
| sh-IMPDH1#3 | CCGGCGGAAGGTCAAGAAGTTTGAACCTCGAG<br>TTCAAACCTTCTTGACCTTCCG     | GV248             |
| sh-FOXO4#1  | CCGGCCTGGAGTGTGACATGGATAACTCGAGTT<br>ATCCATGTCACACTCCAGGTTTTTG | GV248             |
| sh-FOXO4#2  | CCGGCCAGCTTCAGTCAGCAGTTATCTCGAGAT<br>AACTGCTGACTGAAGCTGGTTTTTG | GV248             |
| sh-FOXO4#3  | CCGGCGTCCACGAAGCAGTTCAAATCTCGAGAT<br>TTGAACTGCTTCGTGGACGTTTTTG | GV248             |
| sh-NC       | TTCTCCGAACGTGTCACGT                                            | GV248             |

**Table S3.** List of candidate binding sites for the promoter region of FGL1 predicted by JASPAR.

| Matrix ID | Name  | Score   | Relative score | Sequence ID                     | Start | End  | Strand | Predicted sequence |
|-----------|-------|---------|----------------|---------------------------------|-------|------|--------|--------------------|
| MA0848.1  | FOXO4 | 11.037  | 0.966854746    | NC_000008.11:c17912365-17910366 | 1166  | 1172 | -      | ATAAACA            |
| MA0848.1  | FOXO4 | 11.037  | 0.966854746    | NC_000008.11:c17912365-17910366 | 1307  | 1313 | -      | ATAAACA            |
| MA0849.1  | FOXO6 | 10.993  | 0.961235516    | NC_000008.11:c17912365-17910366 | 1166  | 1172 | -      | ATAAACA            |
| MA0849.1  | FOXO6 | 10.993  | 0.961235516    | NC_000008.11:c17912365-17910366 | 1307  | 1313 | -      | ATAAACA            |
| MA0480.1  | Foxo1 | 10.7362 | 0.905607522    | NC_000008.11:c17912365-17910366 | 1216  | 1226 | -      | AGCTGTTTTTA        |
| MA0849.1  | FOXO6 | 10.6653 | 0.955625989    | NC_000008.11:c17912365-17910366 | 698   | 704  | -      | GTCAACA            |
| MA0848.1  | FOXO4 | 10.6357 | 0.958921266    | NC_000008.11:c17912365-17910366 | 698   | 704  | -      | GTCAACA            |
| MA0157.2  | FOXO3 | 9.83891 | 0.90545055     | NC_000008.11:c17912365-17910366 | 719   | 726  | -      | GTAAAAAA           |
| MA0157.2  | FOXO3 | 9.69352 | 0.902518451    | NC_000008.11:c17912365-17910366 | 1474  | 1481 | +      | GGAAACAA           |
| MA0476.1  | FOS   | 9.58744 | 0.916807256    | NC_000008.11:c17912365-17910366 | 206   | 216  | +      | TATTATTCATT        |
| MA0848.1  | FOXO4 | 8.95918 | 0.925776009    | NC_000008.11:c17912365-17910366 | 218   | 224  | -      | ATCAACA            |
| MA0848.1  | FOXO4 | 8.95918 | 0.925776009    | NC_000008.11:c17912365-17910366 | 1640  | 1646 | -      | ATCAACA            |
| MA0848.1  | FOXO4 | 8.5719  | 0.91811942     | NC_000008.11:c17912365-17910366 | 71    | 77   | +      | ATAAATA            |
| MA0848.1  | FOXO4 | 8.5719  | 0.91811942     | NC_000008.11:c17912365-17910366 | 1456  | 1462 | +      | ATAAATA            |
| MA0849.1  | FOXO6 | 8.40093 | 0.916861502    | NC_000008.11:c17912365-17910366 | 218   | 224  | -      | ATCAACA            |
| MA0849.1  | FOXO6 | 8.40093 | 0.916861502    | NC_000008.11:c17912365-17910366 | 1640  | 1646 | -      | ATCAACA            |
| MA0849.1  | FOXO6 | 8.23405 | 0.914004601    | NC_000008.11:c17912365-17910366 | 1821  | 1827 | +      | GTACACA            |
| MA0848.1  | FOXO4 | 7.68615 | 0.90060836     | NC_000008.11:c17912365-17910366 | 1821  | 1827 | +      | GTACACA            |
